# Supplementary material
Source: publisher figshare collection journal article supplement (https://tandf.figshare.com/ndownloader/files/14964782)
Supplement: Supplementary file 1 [file 14964782]

## Sheet: Supplemental Table S1
Supplemental Table S2. Multi nutreints concentration in barley grains assessed using Atomic Absorption Spectroscopy (AAS) of barley grain samples collected from Marchouch and Inductively Coupled Plasma-Optical Emission Spectrometry (ICP-OES) for barley grain samples collected from Jemma Shiam in Wet Land Research Group Laboratory, North Dakota State University, Fargo, ND in 2015.
AM-14 ID	Seed Source	Plot number in Morocco 2014	Adaptation	Germplams types	Row type	Pedigree	Jemma Shiam Micronutrients (mg kg-1)
							Ba 455.404	Ca 422.673	Cu 324.754	Fe 239.562	K 766.491	Mg 202.647	Mn 257.611	Na 589.592	P 178.287	S 180.731	Si 251.612	Sr 407.771	Zn 213.856
AM-1	MP1-1_2014: ICARDA-Breeding program	MP1-1	Low Input	Breeding lines	6	Alanda/5/Aths/4/Pro/TolI//Cer*2/TolI/3/5106/6/Baca'S'/3/AC253//CI08887/CI05761	3.19623	512.701	3.04018	33.4621	5253.03	1329.64	16.8114	322.897	3553.81	1383.49	221.02	1.63589	19.4669
AM-2	MP2-2_2014: ICARDA-Breeding program	MP2-2	Low Input	Breeding lines	6	Zarjau/80-5151//OK84817	3.43444	475.358	4.30023	37.208	4888.24	1303.62	10.7974	302.631	3028.62	1348.71	232.49	1.51883	14.7406
AM-3	MP3-3_2014: ICARDA-Breeding program	MP3-3	Low Input	Breeding lines	6	Rhn-03/Candela	4.73832	601.535	2.53159	29.6683	5000.73	1486.47	14.1632	409.805	3641.24	1359.06	206.491	2.61862	21.3958
AM-4	MP4-4_2014: ICARDA-Breeding program	MP4-4	Low Input	Breeding lines	6	Avt/Attiki//M-Att-73-337-1/3/Aths/Lignee686/4/Lignee527/NK1272//JLB70-63	1.23974	560.338	3.41139	48.6738	5129.46	1432.09	15.3346	492.555	3712.56	1451.09	168.143	1.09046	16.8854
AM-5	MP5-5_2014: ICARDA-Breeding program	MP5-5	Low Input	Breeding lines	6	Arizona5908/Aths//Avt/Attiki/3/S.T.Barley/4/Aths/Lignee686/5/Maknusa	0.585828	398.503	3.50326	43.3568	4965.12	1427.23	15.4035	168.902	3973.54	1381.57	123.624	0.655595	19.3815
AM-6	MP6-6_2014: ICARDA-Breeding program	MP6-6	Low Input	Breeding lines	6	Rhn-03/Alanda	2.27568	566.587	2.56816	38.84	5160.18	1355.88	12.9161	253.431	3535.42	1240.48	198.809	1.4889	17.2876
AM-7	MP7-7_2014: ICARDA-Breeding program	MP7-7	Low Input	Breeding lines	2	Clipper//WI2291*2/WI2269/7/Hml-02/5/Cq/Cm//Apm/3/12410/4/Giza134-2L/6/Clipper/Volla/3/Arr/Esp//Alger/Ceres362-1-1/4/Hml	2.07778	349.146	5.16235	33.9038	4486.88	1339.39	10.6786	173.928	3166.28	1371.79	235.14	0.9469	18.5637
AM-8	MP8-8_2014: ICARDA-Breeding program	MP8-8	Low Input	Breeding lines	6	Nadawa/Rhn-03//Saida	1.1951	332.815	2.80001	48.3042	5076.97	1692.74	19.3249	174.338	4362.64	1673.01	196.676	0.738905	19.1882
AM-9	MP9-9_2014: ICARDA-Breeding program	MP9-9	Low Input	Breeding lines	6	Nadawa/Rhn-03//Birka	6.03133	374.557	3.27244	31.4636	4955.45	1237.1	12.0102	287.819	3554.78	1092.28	243.142	1.28893	18.2348
AM-10	MP10-10_2014: ICARDA-Breeding program	MP10-10	Low Input	Breeding lines	6	Aths/Lignee686/4/Avt/Attiki//Aths/3/Giza121/Pue	2.83846	264.201	3.30264	28.7757	4458.02	1285.8	12.3832	276.522	3529.63	1365.55	175.257	0.745779	16.9939
AM-11	MP11-11_2014: ICARDA-Breeding program	MP11-11	Low Input	Variety	2	Tichedrette	4.49646	414.924	3.75162	33.627	4847.79	1655.63	14.3098	141.575	4011.33	1354.81	397.78	1.34494	25.2026
AM-12	MP12-12_2014: ICARDA-Breeding program	MP12-12	Low Input	Breeding lines	2	Soufara-02/3/RM1508/Por//WI2269/4/Hml-02/ArabiAbiad//ER/Apm/5/((GalleonxRichard)/5)xTilga	3.34785	326.715	3.11257	30.9663	4585.7	1375.62	12.9431	185.374	3050.02	1138.16	88.6257	0.988835	14.0466
AM-13	MP13-13_2014: ICARDA-Breeding program	MP13-13	Low Input	Breeding lines	6	Arar/Lignee527/4/Gloria'S'/Saida//Mtn'S'/EH165/3/LBIran/Una80//Lignee640	4.6648	434.29	2.81772	27.7318	4253.85	1487.37	11.0565	253.661	2976.45	1158.04	159.215	1.51761	17.9893
AM-14	MP14-14_2014: ICARDA-Breeding program	MP14-14	Low Input	Breeding lines	2	GK58/3/Kc/MullersHeydla//Sls/4/Wieselbuger//Ahor1303-61//Ste/Antares	5.36168	559.87	3.7653	34.2133	5398.01	1439.31	12.647	189.225	3937.06	1122.96	206.936	1.78149	24.8586
AM-15	MP15-15_2014: ICARDA-Breeding program	MP15-15	Low Input	Breeding lines	6	Baladieldawaia/Alanda-01	2.07529	357.054	1.79666	31.7434	5510.73	1231.7	11.7485	141.348	3522.29	1346.7	211.05	1.02576	15.4087
AM-16	MP16-16_2014: ICARDA-Breeding program	MP16-16	Low Input	Breeding lines	6	Rhn-03/Alanda	1.40651	533.506	2.77546	31.2555	5291.05	1352.37	11.7672	148.851	3836.93	1146.99	134.559	1.15673	21.4759
AM-17	MP17-17_2014: ICARDA-Breeding program	MP17-17	Low Input	Breeding lines	2	Sadik-05//Sls/Bda	3.14744	492.933	5.56771	45.4882	4738.39	2024.22	17.5554	139.106	4644.08	1558.55	202.544	1.15213	34.2089
AM-18	MP18-18_2014: ICARDA-Breeding program	MP18-18	Low Input	Breeding lines	6	Massine/Arig8	3.71908	348.19	2.76424	34.2296	4207.28	1250.69	15.0086	226.419	3228.87	1350.45	129.907	0.906492	17.0075
AM-19	MP19-19_2014: ICARDA-Breeding program	MP19-19	Low Input	Breeding lines	6	As46//DeirAlla106/Strain205/3/Hyb85-6//As46/Aths*2	0.970242	300.198	8.99342	44.9152	4392.97	1455.42	18.3486	332.943	4335.62	1699.67	189.026	0.787034	27.493
AM-20	MP20-20_2014: ICARDA-Breeding program	MP20-20	Low Input	Breeding lines	6	Rhn-03/Solen	1.56066	427.197	2.6828	41.4741	5378.52	1652.28	11.8666	276.274	3518.46	1487.04	212.427	1.1138	17.6032
AM-21	MP21-21_2014: ICARDA-Breeding program	MP21-21	Low Input	Breeding lines	6	Rhn-03/4/Atem/Roho//Katade/3/Aramir/ArabiAbiad	2.39627	353.074	6.0703	33.9346	5634.14	1577.49	12.855	243.625	3849.36	1286.47	207.357	0.871402	18.2712
AM-22	MP22-22_2014: ICARDA-Breeding program	MP22-22	Low Input	Breeding lines	6	Saida/6/Cita'S'/4/Apm/Rl//Manker/3/Maswi/Bon/5/Copal'S'/7/Malouh/8/Express	3.07416	443.981	3.41822	36.7489	5065.99	1363.88	14.4108	186.083	3652.98	1200.91	209.283	1.38939	19.4497
AM-23	MP23-23_2014: ICARDA-Breeding program	MP23-23	Low Input	Breeding lines	6	Alanda//Ssn/Lignee640/3/QB813-2	1.72261	373.816	3.77269	33.537	4307.87	1674.78	13.9813	205.805	3216.18	1234.53	169.373	0.992508	18.1231
AM-24	MP24-24_2014: ICARDA-Breeding program	MP24-24	Low Input	Breeding lines	6	Aths/Lignee686//Arimar/Aths/3/Aths/Lignee686/4/80-5145/Rhn-05/3/As46//Giza121/Pue	4.8064	425.224	3.61068	24.679	5599.94	1533.78	10.5926	325.268	3790.73	1175.48	160.964	1.15075	17.2656
AM-25	MP25-25_2014: ICARDA-Breeding program	MP25-25	Low Input	Breeding lines	6	Rihane-03/3/As46/Aths*2//Aths/Lignee686/6/M64-76/Ben//Jo/York/3/M5/Galt//As46/4/Hj34-80/Astrix/5/M6/Robur-35-6-3	1.52237	551.987	2.42808	35.7144	6764.65	1561.94	10.6825	226.414	4219.3	1462.3	189.483	1.55418	17.9073
AM-26	MP26-26_2014: ICARDA-Breeding program	MP26-26	Low Input	Breeding lines	6	Rhn-03/AC_Bacon	2.60951	525.971	3.07095	43.5292	5397.59	1350.89	12.8312	242.606	3789.9	1386.69	181.87	1.62571	15.9371
AM-27	MP27-27_2014: ICARDA-Breeding program	MP27-27	High Input	Breeding lines	2	LIMON/BICHY2000//DEFRA/DESCONOCIDA-BAR	3.14876	334.75	3.81073	28.7793	4929.59	1269.71	12.4778	159.84	3048.37	1309.72	190.431	1.22771	19.3272
AM-28	MP28-28_2014: ICARDA-Breeding program	MP28-28	High Input	Breeding lines	6	CANELA/5/PENCO/CHEVRON-BAR/3/ATACO/BERMEJO//HIGO/4/PETUNIA1	0.73974	423.058	5.85124	39.6289	4427.01	1272.38	16.2286	288.138	2689.09	1420.49	56.8543	1.46573	12.3891
AM-29	MP29-29_2014: ICARDA-Breeding program	MP29-29	High Input	Breeding lines	6	LAMOLINA96/FALCON-BAR	1.0868	378.359	5.1869	27.2245	7721.47	1371.87	8.52366	92.1437	4233.75	1394.07	32.1205	0.790613	27.1946
AM-30	MP30-30_2014: ICARDA-Breeding program	MP30-30	High Input	Breeding lines	2	BICHY2000/SHENMAINO.3	3.73135	316.976	4.93175	47.262	4891.84	1318.42	14.6193	209.221	3407.25	1543.3	33.6654	0.911304	18.0349
AM-31	MP31-31_2014: ICARDA-Breeding program	MP31-31	High Input	Breeding lines	6	BBSC/CONGONA	1.9616	186.411	9.87114	42.5711	5263.6	1632.74	16.0857	157.82	4700.58	1685.64	89.7173	0.465986	24.7036
AM-32	MP32-32_2014: ICARDA-Breeding program	MP32-32	High Input	Breeding lines	2	H0004700509/3H0019	2.61055	428.463	8.86675	54.5737	4441.71	1425.55	18.0652	167.613	3571.72	1629.77	44.7273	1.4263	17.2273
AM-33	MP33-33_2014: ICARDA-Breeding program	MP33-33	High Input	Breeding lines	6	CABUYA/MJA//PETUNIA1/5/PENCO/CHEVRON-BAR/3/ATACO/BERMEJO//HIGO/4/PETUNIA1	0.740036	336.729	4.46288	34.9794	4145.66	1448.11	16.0857	191.18	3347.51	1567.3	50.5416	0.546012	18.9264
AM-34	MP34-34_2014: ICARDA-Breeding program	MP34-34	High Input	Breeding lines	6	N0104700309/2H0041	0.908417	452.951	4.01785	39.7716	3724.24	1376.98	15.4552	135.652	3242.95	1548.91	33.1121	0.894094	16.6889
AM-35	MP35-35_2014: ICARDA-Breeding program	MP35-35	High Input	Breeding lines	6	CABUYA/MJA//PETUNIA1/5/PENCO/CHEVRON-BAR/3/ATACO/BERMEJO//HIGO/4/PETUNIA1	2.11514	428.26	6.97665	39.7878	4727.44	1649.45	22.9297	130.038	4121.19	1704.07	28.8199	1.14667	21.5782
AM-36	MP36-36_2014: ICARDA-Breeding program	MP36-36	High Input	Breeding lines	6	PENCO/CHEVRON-BAR/3/LEGACY//PENCO/CHEVRON-BAR	1.40683	384.953	3.50856	33.1657	4611.09	1729.06	21.0036	172.063	3512.41	1328.52	37.6066	1.0743	17.289
AM-37	MP37-37_2014: ICARDA-Breeding program	MP37-37	High Input	Breeding lines	6	PENCO/CHEVRON-BAR/3/LEGACY//PENCO/CHEVRON-BAR	1.63864	429.607	3.376	34.057	4285.53	1349.21	11.9326	178.38	3535.77	1167.43	21.7238	0.893023	22.5135
AM-38	MP38-38_2014: ICARDA-Breeding program	MP38-38	High Input	Breeding lines	6	BREA/DL70//CABUYA/4/PENCO/CHEVRON-BAR//CANTUA/3/TOCTE	2.25296	288.76	3.50607	37.1694	4762.71	1611.12	16.9164	72.0514	3604.01	1441.67	36.2572	0.864561	18.778
AM-39	MP39-39_2014: ICARDA-Breeding program	MP39-39	High Input	Variety	6	CDCRATTAN	1.68521	384.573	3.86106	44.961	3965.82	1591.69	19.0863	175.477	3673.49	1371.05	34.3141	0.948697	21.5422
AM-40	MP40-40_2014: ICARDA-Breeding program	MP40-40	High Input	Breeding lines	2	BICHY2000/SHENMAINO.3	3.97348	313.132	3.0636	33.4202	5302.67	1274.24	13.7291	123.872	3959.72	1242.91	224.296	0.993726	25.2337
AM-41	MP41-41_2014: ICARDA-Breeding program	MP41-41	High Input	Variety	6	TYTO	3.14248	361.091	2.41354	30.7984	4406.14	1215.03	14.8413	206.456	3560.05	1329.54	23.1762	1.18527	20.9864
AM-42	MP42-42_2014: ICARDA-Breeding program	MP42-42	Low Input	Breeding lines	6	Alanda-0112/Petunia1	1.39763	365.224	3.54092	28.4155	4909.94	1624.47	15.0899	154.412	3851.72	1323.88	47.9824	1.03008	22.8516
AM-43	MP43-43_2014: ICARDA-Breeding program	MP43-43	Low Input	Breeding lines	2	WI3167/6/ANCA/2469//TOJI/3/SHYRI/4/ATACO/5/ALELI/7/Viringa'S'//WI2291/WI2269/3/Viringa'S'	4.25385	435.694	3.42084	35.5628	4785.97	1593.58	17.6957	114.771	4119.72	1388.13	30.881	1.35207	26.5803
AM-44	MP44-44_2014: ICARDA-Breeding program	MP44-44	Low Input	Breeding lines	2	WI3167/6/ANCA/2469//TOJI/3/SHYRI/4/ATACO/5/ALELI/7/Clipper/4/Alger/Ceres//Sls/3/ER/Apm	2.39245	302.387	3.65038	36.8348	4751.66	1724.42	14.9179	189.341	3440.95	1420.8	34.2838	0.789665	20.1036
AM-45	MP45-45_2014: ICARDA-Breeding program	MP45-45	Low Input	Breeding lines	6	Libya/ICNBF8-614/4/Giza126/3/Lignee527/NK1272//Alanda	1.50628	473.997	3.0941	39.7398	6534.48	1281.65	16.4298	361.459	4566.85	1517.98	210.469	0.992137	16.9643
AM-46	MP46-46_2014: ICARDA-Breeding program	MP46-46	Low Input	Breeding lines	2	WI3167/6/ANCA/2469//TOJI/3/SHYRI/4/ATACO/5/ALELI/7/Arar/Lignee527//Zy/DL69	2.40512	479.189	6.84979	43.7062	4558.66	1429.01	18.5473	158.781	3632.46	1603.59	39.8541	1.19013	20.9428
AM-47	MP47-47_2014: ICARDA-Breeding program	MP47-47	Low Input	Breeding lines	2	WI3167/6/ANCA/2469//TOJI/3/SHYRI/4/ATACO/5/ALELI/7/Schooner/Babunj//Noor68/Kataf	2.90221	399.421	4.7163	35.0083	4478.37	1467.83	16.7558	143.66	3756.69	1360.89	44.6843	1.15592	25.345
AM-48	MP48-48_2014: ICARDA-Breeding program	MP48-48	Low Input	Breeding lines	2	WI3167/6/ANCA/2469//TOJI/3/SHYRI/4/ATACO/5/ALELI/7/Clipper/4/Alger/Ceres//Sls/3/ER/Apm	3.58868	285.233	5.53045	66.2021	4288.35	1698.73	20.7308	230.925	3977.61	1764.29	45.233	1.02967	18.5548
AM-49	MP49-49_2014: ICARDA-Breeding program	MP49-49	Low Input	Breeding lines	6	IPA7/4/AwBlack/Aths//Arar/3/9Cr279-07/Roho/5/Alanda-01//Gerbel/Hma/3/Saida	3.2742	373.054	2.81408	37.3463	5071.83	1383.58	14.594	181.293	3784.79	1557.77	19.1231	0.912033	19.5122
AM-50	MP50-50_2014: ICARDA-Breeding program	MP50-50	Low Input	Breeding lines	2	Viringa'S//WI2291/WI2269/3/H.spont.38-3/Akrash-01	2.67074	414.277	3.19257	28.5163	4880.21	1911.03	13.9203	175.421	4091.9	1268.11		1.0713	25.7761
AM-51	MP51-51_2014: ICARDA-Breeding program	MP51-51	Low Input	Breeding lines	2	WI3167/6/ANCA/2469//TOJI/3/SHYRI/4/ATACO/5/ALELI/7/Schooner/Babunj//Noor68/Kataf	2.55904	390.869	3.54694	44.1979	4616.56	1713.31	16.9009	123.419	3708.73	1557	28.0884	0.9534	16.3552
AM-52	MP52-52_2014: ICARDA-Breeding program	MP52-52	Low Input	Breeding lines	2	WI3167/6/ANCA/2469//TOJI/3/SHYRI/4/ATACO/5/ALELI/7/BKFMaguelone1604/3/Apro//Sv.02109/Mari/4/Giza119/5/Shyri	1.47317	379.806	4.3709	40.1432	6033.06	1642.67	13.6411	193.448	4596.45	1789.91	27.7201	0.87248	21.217
AM-53	MP53-53_2014: ICARDA-Breeding program	MP53-53	Low Input	Breeding lines	6	Aths/Lignee686//Orge905/Cr289-53-2/3/PETUNIA2/6/M64-76/Ben//Jo/York/3/M5/Galt//As46/4/Hj34-80/Astrix/5/M6/Robur-35-6-3	4.06604	325.967	3.42396	35.2762	4407.74	1416.53	16.7407	188.887	3557.45	1493.35	25.1094	1.0274	18.7601
AM-54	MP54-54_2014: ICARDA-Breeding program	MP54-54	High input	Breeding lines	2	Coss/OWB71080-44-1H//Viringa'S'/3/WI3180	5.00918	320.756	3.34431	36.3663	4536.46	1635.01	15.7754	167.91	3767.06	1233.5	38.4075	0.988045	21.8382
AM-55	MP55-55_2014: ICARDA-Breeding program	MP55-55	Low Input/Naked barley	Breeding lines	2	Atahualpa/IraqiBlack/6/Viringa'S'//WI2291/WI2269/5/Atahualpa/4/300Union/Sv73608//Perugia/3/W28G15-1-N/Weihenstephan173	1.48273	382.889	4.07447	41.669	5039.4	1712.11	14.6209	223.936	3996.33	1612.7	174.378	0.951113	22.2932
AM-56	MP56-56_2014: ICARDA-Breeding program	MP56-56	Low Input	Breeding lines	2	WI3167/6/ANCA/2469//TOJI/3/SHYRI/4/ATACO/5/ALELI/7/Viringa'S'//WI2291/WI2269/3/Viringa'S'	3.72504	287.833	3.58154	35.8144	4816.09	1455.54	16.1179	175.847	3824.23	1421.54	29.4688	0.98813	22.1424
AM-57	MP57-57_2014: ICARDA-Breeding program	MP57-57	High Input	Breeding lines	2	Demhay/4/Viringa'S'//WI2291/WI2269/3/Viringa'S'	4.06364	596.604	5.60339	42.0911	5483.07	1607.5	17.9469	226.772	4278.72	1449.87	64.7559	1.6492	25.4618
AM-58	MP58-58_2014: ICARDA-Breeding program	MP58-58	Low Input	Breeding lines	2	WI3167/6/ANCA/2469//TOJI/3/SHYRI/4/ATACO/5/ALELI/7/Schooner/Babunj//Noor68/Kataf	1.68318	446.432	5.06807	46.5277	4728.16	1461.25	16.6789	163.041	3367.2	1539.82	32.3434	1.11425	17.6876
AM-59	MP59-59_2014: ICARDA-Breeding program	MP59-59	High Input??	Breeding lines	2	Viringa'S/Tarida	1.23531	342.949	4.80671	41.5201	4770.4	1524.53	17.2297	289.728	3796.65	1519.84	25.5	0.825444	21.326
AM-60	MP60-60_2014: ICARDA-Breeding program	MP60-60	Low Input	Breeding lines	6	Alanda/5/Aths/4/Pro/TolI//Cer12/TolI/3/5106/6/Aths/7/Giza129	0.492418	334.347	5.03771	44.3094	4462.86	1796.03	17.8471	179.713	3413.63	1535.73	35.5157	0.589983	18.8226
AM-61	MP61-61_2014: ICARDA-Breeding program	MP61-61	Low Input/Naked barley	Breeding lines	2	ICNB93-369//Atahualpa/IraqiBlack	1.73325	232.847	6.16508	52.0922	5443.98	1558.53	17.5867	152.965	5023.42	1898.07	33.7139	0.706347	26.9421
AM-62	MP62-62_2014: ICARDA-Breeding program	MP62-62	Low Input	Breeding lines	6	Alanda/Zafraa//Gloria'S'/Copal'S'/3/F6NB_7	6.27619	467.802	3.65184	31.2667	4332.75	1758.89	16.7379	134.716	3972.94	1280.58	32.8558	1.47318	24.3406
AM-63	MP63-63_2014: ICARDA-Breeding program	MP63-63	High Input	Breeding lines	2	Coss/OWB71080-44-1H//Viringa'S'/3/Viringa'S'	3.70109	262.513	3.66059	41.6556	4748.3	1512.96	13.1626	266.005	4152.79	1190.56	39.8753	0.728784	32.8811
AM-64	MP64-64_2014: ICARDA-Breeding program	MP64-64	Low Input	Breeding lines	2	Viringa'S//WI2291/WI2269/3/H.spont.38-3/Akrash-01	2.27454	421.317	4.03457	57.4977	6219	1996	17.1624	62.1809	5428.79	1768.31	36.6604	0.950733	30.7422
AM-65	MP65-65_2014: ICARDA-Breeding program	MP65-65	Low Input	Breeding lines	6	Aths/Lignee686//Orge905/Cr289-53-2/3/F6NB_7	4.23975	525.808	3.15038	35.5055	5258.61	1428.51	17.0114	270.566	4217.59	1400.39	27.9395	2.0294	20.2625
AM-66	MP66-86_2014: ICARDA-Breeding program	MP66-86	High Input/Low Input	Breeding lines	6	U.Sask.1766/Api//Cel/3/Weeah/4/Giza121/Pue	2.0912	494.633	2.95984	29.2501	6179.6	1494.74	13.1126	238.508	4272.83	1304.03	403.616	1.6573	22.4237
AM-67	MP67-87_2014: ICARDA-Breeding program	MP67-87	High Input/Irrigated	Variety	6	RD2668_1	2.81029	521.993	3.3485	35.9372	4967.85	1290.02	15.4995	241.889	3607.85	1439.12	163.075	1.81203	18.6394
AM-68	MP68-88_2014: ICARDA-Breeding program	MP68-88	Low Input	Variety	6	Furat-1	2.78823	373.462	2.85584	42.6044	4532.64	1285.45	14.7212	119.606	3409.97	1512.65	274.9	1.27089	18.9343
AM-69	MP69-89_2014: ICARDA-Breeding program	MP69-89	High Input	Collection	6	Pol2	7.4184	416.225	2.51199	29.574	5221.82	1333.82	12.4489	226.425	3304.34	1202.59	191.014	1.55667	19.1447
AM-70	MP70-90_2014: ICARDA-Breeding program	MP70-90	High Input	Collection	2	Pol3	2.27204	300.051	3.30786	27.8651	5398.36	1257.59	12.4188	157.949	3034.79	1083.92	181.231	0.827872	18.0904
AM-71	1GSBYT-101_2014: ICARDA-Breeding program	1GSBYT-101	Low Input	Breeding lines	2	Akrash//WI2291/WI2269/3/Sls/Akrash-02	2.14989	369.403	3.64727	31.3791	5101.91	1343.31	11.5153	110.756	3931.3	1365.54	174.516	0.984975	27.5402
AM-72	1GSBYT-102_2014: ICARDA-Breeding program	1GSBYT-102	Low Input	Breeding lines	2	Tadmor//ER/Apm/3/Zanbaka	0.848552	493.602	2.73438	44.1741	4265.6	1542.54	14.4665	162.812	2373.13	1316.74	239.724	1.7552	13.1721
AM-73	1GSBYT-103_2014: ICARDA-Breeding program	1GSBYT-103	Low Input	Breeding lines	6	Uzno-Kazakastan/4/Sonata/3/4679/105//YEA132TH	2.69688	316.916	3.50186	35.5055	4445.15	1446.51	11.1317	230.078	3396.97	1069.55	192.701	1.19663	17.0938
AM-74	1GSBYT-104_2014: ICARDA-Breeding program	1GSBYT-104	Low Input	Breeding lines	2	AwBlack/Aths//Rhn-08/3/Malouh	3.22005	398.961	3.22541	36.1101	5809.12	1439.13	12.9805	125.182	3475.26	1646.86	535.834	1.10575	16.6542
AM-75	1GSBYT-105_2014: ICARDA-Breeding program	1GSBYT-105	Low Input	Breeding lines	6	Baishishek/5/Nd10277/Shyri//Nd11231/Shyri/3/Azaf/4/Canela/Gob96Dh	1.08724	318.739	4.57587	27.0299	3653.52	1431.92	11.6958	213.989	3039.99	1106.03	168.623	0.831165	17.8828
AM-76	1GSBYT-106_2014: ICARDA-Breeding program	1GSBYT-106	Low Input	Breeding lines	2	Tadmor//ER/Apm/3/Zanbaka	3.35186	311.424	3.46835	35.5185	4738.33	1412.27	13.305	101.257	3469.21	1297.03	190.676	1.03173	19.0177
AM-77	1GSBYT-107_2014: ICARDA-Breeding program	1GSBYT-107	Low Input	Breeding lines	2	Fedora/Express//Rhn-03	2.65856	446.236	4.51534	32.3862	4593.06	1401	13.2489	176.409	3504.78	1409.62	223.073	1.43414	22.7197
AM-78	1GSBYT-108_2014: ICARDA-Breeding program	1GSBYT-108	Low Input	Breeding lines	6	Ssn/Bda//Arar/3/F2CC33MS/CI07555/4/Avt/Attiki//M-Att-73-337-1/3/Aths/Lignee686	1.40346	441.983	6.06545	33.8664	5575.42	1497.43	11.9567	173.922	3457.54	1365.98	255.109	1.07173	16.2772
AM-79	1GSBYT-109_2014: ICARDA-Breeding program	1GSBYT-109	Low Input	Breeding lines	2	WI2198/Hml-02//INRA55-86-2/Rt1703/3/Hml	1.37491	501.654	4.01946	35.4815	4140.93	1221.36	12.1902	272.531	2463.97	1238.05	169.007	1.71842	12.9374
AM-80	1GSBYT-110_2014: ICARDA-Breeding program	1GSBYT-110	Low Input	Breeding lines	2	GK58/3/Kc/MullersHeydla//Sls/4/Wieselbuger//Ahor1303-61//Ste/Antares	2.62024	398.064	4.09892	32.7687	5458.06	1422.87	11.5821	194.476	3824.88	1333.11	234.021	1.07218	23.3194
AM-81	1GSBYT-111_2014: ICARDA-Breeding program	1GSBYT-111	Low Input	Breeding lines	2	Soufara-02/3/RM1508/Por//WI2269/4/Hml-02/ArabiAbiad//ER/Apm	3.23116	309.597	8.24384	30.3581	5090.35	1498.51	13.8109	164.096	3714.5	1299.91	215.786	0.948697	21.8906
AM-82	1GSBYT-112_2014: ICARDA-Breeding program	1GSBYT-112	Low Input	Breeding lines	2	Akrash//WI2291/WI2269/3/Sls/Akrash-02	0.952531	494.128	3.74217	41.4801	4972.76	1534.32	14.3058	169.228	3918.45	1470.5	175.911	1.6156	24.5138
AM-83	1GSBYT-113_2014: ICARDA-Breeding program	1GSBYT-113	Low Input	Breeding lines	6	Malouh//Aths/Lignee686	1.20698	454.712	3.02329	29.2224	4365.37	1446.47	12.5159	246.725	3973.66	1011.5	141.794	0.926299	23.8941
AM-84	1GSBYT-114_2014: ICARDA-Breeding program	1GSBYT-114	Low Input	Breeding lines	2	Moroc9-75/Hml-02/5/Clipper/Volla/3/Arr/Esp//Alger/Ceres362-1-1/4/Hml	1.57279	333.248	4.19167	37.2766	4921.65	1146.82	11.2227	169.945	3196.32	1149.39	189.655	0.926299	15.0153
AM-85	1GSBYT-115_2014: ICARDA-Breeding program	1GSBYT-115	Low Input	Breeding lines	2	Clipper//WI2291*2/WI2269/3/Furat 2	1.4388	298.13	2.83908	40.8174	5187.72	1549.37	13.4044	99.0513	3908.66	1492.32	163.164	0.738905	16.5594
AM-86	1GSBYT-116_2014: ICARDA-Breeding program	1GSBYT-116	Low Input	Breeding lines	2	3896/1-3/4/1246/1-3/3/3887/28//3892/1-3/5/Grivita/6/Antares/Ky63-1294//Marageh	5.99189	402.179	3.87179	38.2515	3822.77	1229.39	15.6194	287.404	2622.44	1488.69	260.042	1.47436	15.299
AM-87	1GSBYT-117_2014: ICARDA-Breeding program	1GSBYT-117	Low Input	Breeding lines	6	Nadawa/Rhn-03//Mtn-01	1.92982	444.35	1.94037	24.7259	5296.57	1225	11.2812	106.124	3514.43	1105.94	168.266	1.11195	18.5147
AM-88	1GSBYT-118_2014: ICARDA-Breeding program	1GSBYT-118	Low Input	Breeding lines	6	Nadawa/Rhn-03/3/Lignee527/Rihane//Arar	3.10533	444.028	6.13712	32.1159	5077.12	1621.14	13.7605	398.812	3080.82	1364.93	184.527	1.3119	18.5523
AM-89	1GSBYT-119_2014: ICARDA-Breeding program	1GSBYT-119	Low Input	Breeding lines	2	Soufara-02/3/RM1508/Por//WI2269/4/Hml-02 /ArabiAbiad//ER /Apm/5/ ((Galleon x Richard)/5)xTilga	3.89906	580.226	4.50851	58.8352	5236.3	1617.77	16.3212	97.5121	4357.06	1314.06	404.239	2.01183	19.8798
AM-90	1GSBYT-120_2014: ICARDA-Breeding program	1GSBYT-120	Low Input	Breeding lines	2	Tipper/ICB-102854//Alpha/Durra	2.64661	381.407	8.43507	34.9091	5052.74	1439.59	12.4156	128.908	4219.08	1282.9	514.626	1.14529	26.0421
AM-91	1GSBYT-121_2014: ICARDA-Breeding program	1GSBYT-121	Low Input	Variety	6	Rihane 03	1.98306	416.316	2.67731	39.2753	5200.81	1325.22	14.8449	192.286	3884.15	1227.8	172.051	1.0789	19.2855
AM-92	1GSBYT-122_2014: ICARDA-Breeding program	1GSBYT-122	Low Input	Variety	6	Local / National Check	4.40648	546.649	3.70191	37.0622	5074.01	1390.35	15.6721	268.589	3583	1141.35	186.689	1.4883	21.9079
AM-93	1GSBYT-123_2014: ICARDA-Breeding program	1GSBYT-123	Low Input	Breeding lines	6	Nadawa/Rhn-03/3/Lignee527/Rihane//Arar	2.79072	688.037	1.58574	36.084	5095.35	1303.79	10.9528	198.413	3619.47	1407.03	165.404	2.19744	22.2156
AM-94	1GSBYT-124_2014: ICARDA-Breeding program	1GSBYT-124	Low Input	Breeding lines	2	Roho/4/Zanbaka/3/ER/Apm//Lignee131	1.07439	388.81	5.61011	51.216	4876.21	1345.18	14.019	246.823	3100.68	1386.2	201.608	0.860805	15.8879
AM-95	1GSBYT-125_2014: ICARDA-Breeding program	1GSBYT-125	Low Input	Breeding lines	6	Arbayan-01//As46/Aths/3/Barjouj	2.96003	540.624	2.45901	22.0879	5248.52	1363.38	11.3651	203.696	3797.37	1034.91	169.048	1.95037	19.04
AM-96	SBYT2-303_2014: ICARDA-Breeding program	SBYT2-303	Low Input	Breeding lines	6	F6-1-Kf/6/Cita'S'/4/Apm/Rl//Manker/3/Maswi/Bon/5/Copal'S'/7/Aths/Lignee686//Orge905/Cr289-53-2	5.2329	451.727	2.91825	26.8873	5271.7	1408.61	12.3507	627.924	3184.2	1099.31	197.711	1.32186	16.1767
AM-97	SBYT2-304_2014: ICARDA-Breeding program	SBYT2-304	Low Input	Breeding lines	6	F6-1-Kf/6/Cita'S'/4/Apm/Rl//Manker/3/Maswi/Bon/5/Copal'S'/7/Aths/Lignee686//Orge905/Cr289-53-2	2.94167	519.377	1.82328	31.5793	5373.06	1341.45	12.7124	607.299	3272.56	1371.89	159.748	2.15518	15.2837
AM-98	SBYT2-312_2014: ICARDA-Breeding program	SBYT2-312	Low Input	Breeding lines	2	WI2269/Espe/3/WI2291/Bgs//Hml-02	1.39874	240.514	4.79447	35.5339	4611.02	1423.02	14.4097	138.344	3229.62	1306.03	436.979	0.614185	19.3119
AM-99	SBYT2-313_2014: ICARDA-Breeding program	SBYT2-313	Low Input	Breeding lines	2	WI2269/3/Roho//Alger/Ceres362-1-1	2.84414	281.928	4.70218	33.2937	4996.09	1451.47	15.6626	119.694	4346.38	1414.4	233.602	0.987735	23.1925
AM-100	SBYT2-317_2014: ICARDA-Breeding program	SBYT2-317	Low Input	Breeding lines	6	Sadik-02/3/Alpha/Durra//Antares/ArabiAbiad	1.90686	445.75	4.47849	33.0805	5428.35	1407.74	14.1949	272.838	3872.77	1470.59	246.173	1.02588	21.7459
AM-101	SBYT2-504_2014: ICARDA-Breeding program	SBYT2-504	Low Input	Breeding lines	2	H.spont.41-1/WI3257	2.28995	429.741	4.35931	40.4348	4607.34	1304.19	15.6601	271.397	2971.51	1392.76	275.855	1.73724	17.5505
AM-102	SBYT2-517_2014: ICARDA-Breeding program	SBYT2-517	Low Input	Breeding lines	2	Carina/Moroc9-75//WI3257	0.840174	317.468	6.37914	43.9097	6705.28	1472.48	13.6567	301.368	4138.36	1392.05	224.003	0.629272	22.1351
AM-103	SBYT2-709_2014: ICARDA-Breeding program	SBYT2-709	Low Input	Breeding lines	2	Arar/H.spont.19-15//Hml/3/H.spont.41-1/Tadmor/4/Barque	2.46081	395.855	4.08147	35.6159	4491.47	1268.85	13.5996	226.071	3037.44	1327.08	312.716	1.30783	19.743
AM-104	SBYT2-1015_2014: ICARDA-Breeding program	SBYT2-1015	Low Input	Breeding lines	2	Hml-02/ArabiAbiad/3/Api/CM67//Nacta/4/WI2269/Espe/5/Mzq/Gva//PI002917/3/WI2291/WI2269	1.23522	266.298	5.57172	51.6548	5584.82	1679.02	15.2436	190.366	4186.26	1550.57	186.837	0.696971	22.7357
AM-105	SBYT2-1018_2014: ICARDA-Breeding program	SBYT2-1018	High Input	Breeding lines	6	U.Sask.1766/Api//Cel/3/Weeah/4/Giza121/Pue	1.07281	356.241	2.75984	28.3718	4580.88	1471.77	13.7065	294.508	3144.71	1096.68	233.791	0.946802	15.7413
AM-106	SBYT2-1215_2014: ICARDA-Breeding program	SBYT2-1215	Low Input	Breeding lines	2	Harmal-02/ArabiAbiad*2/4/Soufara-02/3/RM1508/Por//WI2269	2.79407	433.296	9.06279	40.1978	4641.26	1581.14	12.8215	200.843	3555.37	1274.54	223.646	1.39503	22.2034
AM-107	SBYT2-1419_2014: ICARDA-Breeding program	SBYT2-1419	Low Input	Breeding lines	2	SLB44-56/Lignee131	1.96684	456.324	4.75348	49.2236	4715.73	1498.25	18.6713	409.885	3285.18	1593.88	258.797	1.23877	16.9074
AM-108	SBYT2-1510_2014: ICARDA-Breeding program	SBYT2-1510	High Input	Breeding lines	6	IQBA07-02	2.15654	498.126	1.81547	30.0472	4346.3	1348.08	8.71331	330.036	2595.66	1130.25	500.667	1.51397	13.1333
AM-109	SBYT2-1516_2014: ICARDA-Breeding program	SBYT2-1516	Low Input	Breeding lines	2	SLB44-56/Lignee131	3.3672	450.215	4.08382	36.3237	5819.69	1419.89	13.1233	255.695	4398.39	1038.95	245.358	1.3208	21.792
AM-110	SBYT2-1517_2014: ICARDA-Breeding program	SBYT2-1517	High input/low input	Variety	6	VAMIKHOCA	2.9073	402.947	2.31137	23.5399	4992.59	1434.47	10.3653	183.811	3745	1095.96	168.874	1.3119	18.4748
AM-111	SBYT2-1519_2014: ICARDA-Breeding program	SBYT2-1519	High Input	Breeding lines	6	IQBA07-22	3.19751	543.479	3.837	43.514	4828.7	1377.92	18.375	360.892	3463.71	1520.82	240.242	1.39504	16.4365
AM-112	SBYT2-1610_2014: ICARDA-Breeding program	SBYT2-1610	Low Input	Breeding lines	2	Moroc9-75//WI2291/CI01387/3/H.spont.41-1	1.07281	450.549	4.55632	42.2453	4361.9	1449.58	15.3974	173.697	2898.17	1426.92	218.648	1.23827	14.6207
AM-113	SBYT2-1615_2014: ICARDA-Breeding program	SBYT2-1615	Low Input	Breeding lines	6	Arar/Rhn-03//Kabaa-03/4/Manal/3/Lignee527/NK1272//JLB70-63	3.38797	593.103	3.73286	32.4961	5887.2	1727.34	12.5073	367.004	3979.35	1269.79	239.515	1.63589	21.8061
AM-114	SBYT2-1619_2014: ICARDA-Breeding program	SBYT2-1619	Low Input	Breeding lines	2	Moroc9-75//WI2291/CI01387/3/H.spont.41-1	0.768973	462.926	5.48894	49.4519	4538.42	1850.34	18.8221	85.3822	3622.18	1768.87	191.289	0.830169	21.2756
AM-115	SBYT2-1710_2014: ICARDA-Breeding program	SBYT2-1710	Low Input	Breeding lines	2	Moroc9-75//WI2291/WI2269	1.9692	360.099	4.99389	36.7459	5304.46	1567.9	14.6907	129.861	4077.44	1278.9	327.822	1.11514	23.1204
AM-116	SBYT2-1719_2014: ICARDA-Breeding program	SBYT2-1719	Low Input	Breeding lines	2	Moroc9-75//WI2291/WI2269	1.54992	428.444	4.21923	41.1649	5456.15	1361.47	13.7524	114.857	3579.23	1164.94	653.031	1.15446	26.6976
AM-117	SBYT2-1919_2014: ICARDA-Breeding program	SBYT2-1919	Low Input	Breeding lines	2	Clipper//WI2291*2/WI2269/5/Soufara-02/3/RM1508/Por//WI2269/4/Hml-02/ArabiAbiad//ER/Apm	3.22134	250.842	3.3426	21.9589	5912.83	1323.71	12.799	209.018	4115.7	1254.11	313.103	0.946143	23.231
AM-118	SBYT2-2008_2014: ICARDA-Breeding program	SBYT2-2008	Low Input	Breeding lines	2	Clipper//WI2291*2/WI2269/5/Soufara-02/3/RM1508/Por//WI2269/4/Hml-02/ArabiAbiad//ER/Apm	2.9291	321.231	2.85196	30.6256	6501.75	1411.6	13	174.563	4032.24	1337.86	224.482	1.03278	21.3126
AM-119	SBYT2-2009_2014: ICARDA-Breeding program	SBYT2-2009	Low Input	Breeding lines	2	Clipper//WI2291*2/WI2269/5/Soufara-02/3/RM1508/Por//WI2269/4/Hml-02/ArabiAbiad//ER/Apm	1.47082	322.255	4.51534	40.4191	5389.18	1364.46	12.9525	164.216	3626.22	1625.16	189.277	0.710211	19.4591
AM-120	SBYT2-2101_2014: ICARDA-Breeding program	SBYT2-2101	Low Input	Breeding lines	6	ArabiAbiad/Arar//H.spont.41-5/Tadmor/3/ArabiAbiad/Arar//H.spont.41-5/Tadmor	1.36491	299.524	4.38428	41.8257	4404.58	1443.36	12.7005	114.128	2757.11	1326.39	208.64	0.710456	14.2314
AM-121	SBYT2-2110_2014: ICARDA-Breeding program	SBYT2-2110	Low Input	Breeding lines	2	Arar/H.spont.19-15//Hml/3/H.spont.41-1/Tadmor/4/Tadmor//ER/Apm	2.93932	261.431	3.65662	39.6036	6616.64	1481.44	11.2425	86.3527	4293.86	1530.22	297.978	0.86318	21.4519
AM-122	SBYT2-2204_2014: ICARDA-Breeding program	SBYT2-2204	Low Input	Breeding lines	2	Hml/Furat-2	1.96238	254.99	8.63842	36.2238	3817.22	1094.53	10.8986	159.265	2630.69	1429.66	175.718	0.786405	12.9657
AM-123	SBYT2-2213_2014: ICARDA-Breeding program	SBYT2-2213	Low Input	Breeding lines	2	Hml/Furat-2	3.61641	331.532	3.19039	36.2539	4137.58	1132.56	11.7302	155.952	2584.37	1269.71	193.918	1.15261	12.3382
AM-124	SBYT2-2214_2014: ICARDA-Breeding program	SBYT2-2214	Low Input	Breeding lines	2	Hml/Furat-2	3.26792	350.207	3.27015	33.8257	4632.7	1405.39	15.6404	229.076	3249.37	1439.7	236.752	1.28093	18.113
AM-125	SBYT2-2216_2014: ICARDA-Breeding program	SBYT2-2216	Low Input	Breeding lines	2	Hml/Furat-2	1.56138	566.593	4.60866	54.0495	5824.55	1693.69	15.9273	150.197	3717.79	1602.63	265.66	2.19657	16.0379
AM-126	SBYT2-2516_2014: ICARDA-Breeding program	SBYT2-2516	Low Input	Breeding lines	2	WI2291/Furat-2	1.40707	320.495	3.73289	52.585	4725.23	1250.07	15.7214	130.644	3732.98	1384.16	201.349	0.729075	16.9711
AM-127	SBYT2-3106_2014: ICARDA-Breeding program	SBYT2-3106	Low Input	Breeding lines	2	NT111//Sonata/Arta	0.874436	359.656	5.50166	40.2872	4188.23	1209.89	12.3798	199.054	2670.44	1332.17	206.796	0.794622	15.701
AM-128	SBYT2-3109_2014: ICARDA-Breeding program	SBYT2-3109	Low Input	Breeding lines	2	Arta/3/Hml-02//Esp/1808-4L/5/Roho/4/Zanbaka/3/ER/Apm//Lignee131	6.1299	432.688	4.58427	29.1615	4679.87	1212.48	15.0954	172.899	3587.91	1188.83	525.29	1.58826	20.1211
AM-129	SBYT2-3110_2014: ICARDA-Breeding program	SBYT2-3110	Low Input	Breeding lines	2	Weeah11//WI2291/Bgs/3/ER/Apm//AC253	5.11679	408.413	5.46829	32.5102	5311.68	1385.49	14.4515	55.9616	4196.2	1263.67	192.682	1.07346	25.7489
AM-130	SBYT2-3116_2014: ICARDA-Breeding program	SBYT2-3116	Low Input	Breeding lines	2	NT111//Sonata/Arta	1.50291	300.704	3.37987	32.5913	4541.92	1289.96	11.7859	201.624	2936.78	1320.77	295.543	0.905768	16.5787
AM-131	SBYT2-3117_2014: ICARDA-Breeding program	SBYT2-3117	Low Input	Breeding lines	2	Weeah11//WI2291/Bgs/3/ER/Apm//AC253	2.45621	370.178	4.56178	56.7558	4646.53	1566.05	19.3019	88.2498	4066.47	1629.11	574.325	0.906249	20.2482
AM-132	SBYT2-3118_2014: ICARDA-Breeding program	SBYT2-3118	Low Input	Breeding lines	2	Weeah11//WI2291/Bgs/3/ER/Apm//AC253	2.91478	342.916	4.22941	47.9383	4598.83	1309.49	17.7593	103.127	3565.75	1534.39	274.78	0.985762	24.2408
AM-133	SBYT2-3119_2014: ICARDA-Breeding program	SBYT2-3119	Low Input	Breeding lines	2	Weeah11//WI2291/Bgs/3/ER/Apm//AC253	3.07479	346.022	3.92991	38.3642	4217.2	1310.73	13.4608	81.8367	2999.31	1296.07	214.369	1.02822	17.2239
AM-134	SBYT2-3120_2014: ICARDA-Breeding program	SBYT2-3120	Low Input	Breeding lines	2	Arta/3/Hml-02//Esp/1808-4L/5/Roho/4/Zanbaka/3/ER/Apm//Lignee131	4.19615	402.895	3.64903	37.3187	4481.58	1090.19	16.2686	262.806	3120.16	1390.27	253.246	1.19426	15.0922
AM-135	SBYT2-3203_2014: ICARDA-Breeding program	SBYT2-3203	Low Input	Breeding lines	2	WI2269/Espe/3/WI2291/Bgs//Hml-02	3.71147	319.967	3.45783	36.9499	6319.83	1348.12	11.1176	123.869	3442.06	1128.73	270.031	1.02793	15.8175
AM-136	SBYT2-3207_2014: ICARDA-Breeding program	SBYT2-3207	Low Input	Breeding lines	2	WI2291/Roho//WI2269/3/WI2291/Bgs//Hml-02	1.07482	604.4	4.12415	46.5801	4443.88	1329.41	12.8666	140.949	2742.14	1262.47	333.914	1.9813	14.7383
AM-137	SBYT2-3216_2014: ICARDA-Breeding program	SBYT2-3216	Low Input	Breeding lines	2	WI2291/WI2269//WI2291/Bgs/3/Hml/WI2291	2.3424	279.597	4.30664	27.8854	4939.93	1375.3	13.3539	175.872	3494.48	1338.79	250.611	0.905768	22.8065
AM-138	SBYT2-3217_2014: ICARDA-Breeding program	SBYT2-3217	Low Input	Breeding lines	2	WI2291/Roho//WI2269/3/WI2291/Bgs//Hml-02	0.206453	339.218	4.51534	41.8642	4780.47	1418.75	14.0637	251.067	3487.88	1561.04	205.541	0.348245	20.7334
AM-139	SBYT2-3219_2014: ICARDA-Breeding program	SBYT2-3219	Low Input	Breeding lines	2	WI2291/Roho//WI2269/3/WI2291/Bgs//Hml-02	1.23621	401.551	6.35787	36.1909	5226.47	1340.04	12.9482	150.365	3053.59	1317.82	416.88	1.19759	15.9859
AM-140	SBYT2-3307_2014: ICARDA-Breeding program	SBYT2-3307	Low Input	Breeding lines	2	Tadmor/WI2291//Arta	4.57369	336.24	3.46974	45.4434	5153.83	1049.77	17.623	127.129	3501.92	1212.12	240.014	1.07386	18.793
AM-141	SBYT2-3310_2014: ICARDA-Breeding program	SBYT2-3310	Low Input	Breeding lines	2	ChiCm/An57//Albert/3/Alger/Ceres362-1-1/4/Arta	5.16408	373.865	3.22413	33.1716	6530.36	1373.13	14.0949	135.851	4356.11	1341.09	199.707	1.18527	22.2692
AM-142	SBYT2-3313_2014: ICARDA-Breeding program	SBYT2-3313	Low Input	Breeding lines	2	Mo.B1337/WI2291//Moroc9-75	1.93213	398.654	3.15505	38.7074	4919.58	1276.15	13.8155	114.927	3117.03	1482.12	334.804	1.03278	13.8859
AM-143	SBYT2-3314_2014: ICARDA-Breeding program	SBYT2-3314	Low Input	Breeding lines	2	ChiCm/An57//Albert/3/Alger/Ceres362-1-1/4/Arta	4.44453	291.2	3.22978	31.0101	4531.22	1359.66	12.5971	236.26	3004.33	1242.76	235.733	1.1138	18.5697
AM-144	SBYT2-3318_2014: ICARDA-Breeding program	SBYT2-3318	Low Input	Breeding lines	2	ChiCm/An57//Albert/3/Alger/Ceres362-1-1/4/Arta	5.46922	305.68	7.77888	35.799	4022.61	1431.82	13.0873	145.839	3545.61	1267.16	233.242	1.26524	19.1377
AM-145	SBYT2-4508_2014: ICARDA-Breeding program	SBYT2-4508	Low Input	Collection	6	Egypt	0.829867	378.334	3.30924	29.2267	4682.44	1470.9	16.9481	160.915	3470.16	1106.31	238.56	0.864215	22.0964
AM-146	SBYT2-4701_2014: ICARDA-Breeding program	SBYT2-4701	Low Input	Collection	6	Tunisia	0.375616	349.942	3.20032	40.7563	4950.29	1272.16	16.7701	111.879	4262.38	1381.17	196.742	0.498349	25.9153
AM-147	SBYT2-4720_2014: ICARDA-Breeding program	SBYT2-4720	Low Input	Collection	6	35881	1.12826	480.004	6.7298	34.9629	5198.26	1657.62	14.0312	223.598	3837.67	1370.52	187.815	0.953018	20.0822
AM-148	SBYT2-4909_2014: ICARDA-Breeding program	SBYT2-4909	Low Input	Collection	6	Barjouj	0.849231	321.653	2.43002	34.8388	4968.41	1610.65	13.396	216.51	3554.23	1262.95	185.023	0.54951	16.0183
AM-149	SBYT2-5203_2014: ICARDA-Breeding program	SBYT2-5203	Low Input	Breeding lines	2	Clipper//WI2291*2/WI2269	1.97442	379.329	8.66586	46.7978	4566.03	1265.04	14.4003	132.787	3113.59	1470.91	198.838	1.03485	16.9204
AM-150	SBYT2-5717_2014: ICARDA-Breeding program	SBYT2-5717	Low Input	Breeding lines	2	Mo.B1337/WI2291//Moroc9-75/4/Arta/3/Hml-02//Esp/1808-4L	2.80254	350.197	2.95747	30.8778	4641.35	1242.82	13.0657	236.174	2977.61	1259.21	220.886	1.22672	14.25
AM-151	SBYT2-6416_2014: ICARDA-Breeding program	SBYT2-6416	Low Input	Breeding lines	2	WI2291/Tadmor/3/ArabiAbiad/Arar//H.spont.41-5/Tadmor	3.82126	403.663	2.77267	38.5069	6327.11	1459.41	16.1654	593.901	2663.66	1124.37	524.305	1.47377	16.1219
AM-152	SBYT2-6708_2014: ICARDA-Breeding program	SBYT2-6708	Low Input	Breeding lines	6	Alanda//Lignee527/Arar/3/BF891M-617/4/Alanda//Lignee527/Arar/3/BF891M-617	2.10739	977.542	4.1258	50.709	5525.32	1604.8	19.3458	464.805	3730.49	1889.75	663.239	1.8173	19.6948
AM-153	SBYT2-6902_2014: ICARDA-Breeding program	SBYT2-6902	Low Input	Breeding lines	2	WI3257/4/ALISO/CI3909-2//HB602/3/MOLA/SHYRI//ARUPO*2/JET	1.91873	296.53	8.01815	63.0647	4816.66	1881.46	15.6634	132.416	3948.69	1515.3	52.7812	0.790297	19.3822
AM-154	SBYT3-103_2014: ICARDA-Breeding program	SBYT3-103	Low Input	Breeding lines	2	Arta//Sonata/Arta	5.15928	375.33	2.85539	36.0283	6113.34	1315.61	13.9805	155.168	3387.12	1220.33	647.609	1.15492	18.7094
AM-155	SBYT3-206_2014: ICARDA-Breeding program	SBYT3-206	Low Input	Breeding lines	6	Lignee527/Aths//Lignee527/NK1272	1.11386	411.1	2.48746	35.2132	5212.75	1428.3	13.0584	187.336	3559.83	1311.38	197.72	0.988835	20.0387
AM-156	SBYT3-207_2014: ICARDA-Breeding program	SBYT3-207	Low Input	Breeding lines	6	Aths/Lignee686/4/Avt/Attiki//Aths/3/Giza121/Pue	3.76816	348.046	2.8107	38.5336	4904.2	1292.31	14.2432	261.738	3546.29	1337.21	177.108	0.991345	19.3389
AM-157	SBYT3-209_2014: ICARDA-Breeding program	SBYT3-209	Low Input	Breeding lines	6	Rihane-03/3/As46/Aths*2//Aths/Lignee686	3.20868	604.513	6.04481	34.844	6044.35	1276.27	13.5981	182.18	4521.32	1289.86	198.325	1.42293	27.0883
AM-158	SBYT3-211_2014: ICARDA-Breeding program	SBYT3-211	Low Input	Breeding lines	6	JLB70-01/5/DeirAlla106//DL70/Pyo/3/RM1508/4/Arizona5908/Aths//Avt/Attiki/3/Ager/6/Alanda	0.911864	354.245	3.42924	43.9787	4692.79	1488.35	15.1911	231.428	3293.75	1326.24	235.01	0.781497	15.3795
AM-159	SBYT3-218_2014: ICARDA-Breeding program	SBYT3-218	Low Input	Breeding lines	6	Aths/Lignee686/4/Avt/Attiki//Aths/3/Giza121/Pue	4.06232	331.26	3.08144	29.9068	5150.75	1671.3	13.2801	200.473	4014.5	1215.79	227.365	0.951874	20.33
AM-160	SBYT3-301_2014: ICARDA-Breeding program	SBYT3-301	Low Input	Breeding lines	6	Avt/Attiki//M-Att-73-337-1/3/Aths/Lignee686/4/Kabaa	1.57923	321.844	2.80065	25.1721	4589.93	1348.32	11.4872	226.4	3343.96	1065.59	195.498	0.865771	15.8993
AM-161	SBYT3-305_2014: ICARDA-Breeding program	SBYT3-305	Low Input	Breeding lines	6	Courlis/Rihane-03//Rhn-03	2.43789	460.424	2.93051	30.8357	5259.68	1699.28	13.4454	301.484	4165.76	1407.08	188.582	1.19425	21.7458
AM-162	SBYT3-308_2014: ICARDA-Breeding program	SBYT3-308	Low Input	Breeding lines	6	Avt/Attiki//M-Att-73-337-1/3/Aths/Lignee686/4/Kabaa	0.74404	381.711	2.70258	30.6075	4357.3	1344.62	11.8603	325.638	3200.42	1320.48	177.9	0.791914	13.897
AM-163	SBYT3-410_2014: ICARDA-Breeding program	SBYT3-410	Low Input	Breeding lines	6	Merzaga(Orge077)/Alanda-01	4.44631	317.53	5.498	27.2119	5072.69	1391.12	11.8714	284.357	3102.7	1250.69	198.965	1.15592	19.5439
AM-164	SBYT3-417_2014: ICARDA-Breeding program	SBYT3-417	Low Input	Breeding lines	6	Alanda/Hamra//Alanda-01	2.50292	389.219	3.69452	35.6984	4933.43	1497.88	13.9398	266.768	4021.56	1354.57	202.523	0.991741	24.6061
AM-165	SBYT3-501_2014: ICARDA-Breeding program	SBYT3-501	Low Input	Breeding lines	6	Nadawa/Rhn-03/3/Lignee527/Rihane//Arar	2.37112	346.361	5.49141	25.6044	4382.06	1315.71	10.5895	144.713	2991.36	1067	185.437	1.02967	16.778
AM-166	SBYT3-505_2014: ICARDA-Breeding program	SBYT3-505	Low Input	Breeding lines	6	Rhn-03//Lignee527/As45/4/Manitou/3/Arbayan-01//CI07117-9/DeirAlla106	1.64321	368.119	1.51193	27.6609	4988.89	1259.35	8.68265	139.79	3211.69	1170.83	203.187	0.947938	16.8435
AM-167	SBYT3-508_2014: ICARDA-Breeding program	SBYT3-508	Low Input	Breeding lines	6	Rhn-03//Lignee527/As45/3/Y25-3-1	5.58588	332.856	7.58891	25.045	5128.02	1236.72	14.0259	259.341	3178.8	1207.46	235.219	1.30574	17.3336
AM-168	SBYT3-516_2014: ICARDA-Breeding program	SBYT3-516	Low Input	Breeding lines	6	Nadawa/Rhn-03/3/Lignee527/Rihane//Arar	4.00518	350.47	2.70789	26.7914	4545.15	1253.31	12.9398	302.697	3146.03	1133.65	315.846	0.96037	21.6462
AM-169	SBYT3-604_2014: ICARDA-Breeding program	SBYT3-604	Low Input	Breeding lines	6	Rhn-03/3/Mr25-84/Att//Mari/Aths*3-02/4/Alanda-01//Gerbel/Hma/3/Saida	1.9293	368.594	2.64797	44.6102	5626.71	1485.05	14.8891	188.577	4552.3	1636.42	190.913	0.948697	21.0388
AM-170	SBYT3-610_2014: ICARDA-Breeding program	SBYT3-610	Low Input	Breeding lines	6	IPA7/4/AwBlack/Aths//Arar/3/9Cr279-07/Roho/5/Rhn-03//Lignee527/As45	4.03364	358.541	2.77546	26.4464	4793.93	1321.63	10.576	137.547	3349.08	976.771	133.335	0.89338	20.754
AM-171	SBYT3-619_2014: ICARDA-Breeding program	SBYT3-619	Low Input/ High Input	Breeding lines	6	JLB70-01/Asher//Russ94-1	4.02299	314.628	4.15383	36.1669	5459.39	1508.07	15.3014	130.067	3875.95	1322.17	221.56	0.90613	25.27
AM-172	SBYT3-706_2014: ICARDA-Breeding program	SBYT3-706	Low Input	Breeding lines	2	Clipper//WI2291*2/WI2269/5/Soufara-02/3/RM1508/Por//WI2269/4/Hml-02/ArabiAbiad//ER/Apm	1.36546	419.391	3.31268	34.4004	4226.78	1525.97	14.2132	143.574	3469.5	1342.69	242.779	1.15352	15.2086
AM-173	SBYT3-806_2014: ICARDA-Breeding program	SBYT3-806	Low Input	Breeding lines	6	Mari/Aths*2//Avt/Attiki/3/Aths/Lignee686/4/Arar//Hr/Nopal	4.44157	515.575	4.09363	32.2975	5174.46	1223.94	13.871	249.302	3777.66	1060.82	554.844	1.42293	20.5062
AM-174	SBYT3-906_2014: ICARDA-Breeding program	SBYT3-906	Low Input	Breeding lines	6	Tadmor//ER/Apm/3/H.spont.38-3/Akrash-01	2.60264	556.921	4.33155	39.4113	6456.08	1407.32	11.6604	239.257	4422.25	1318.13	382.395	1.74858	22.5135
AM-175	SBYT3-1007_2014: ICARDA-Breeding program	SBYT3-1007	Low Input	Breeding lines	6	Lignee527/Chn-01//Alanda/5/Arizona5908/Aths//Avt/Attiki/3/S.T.Barley/4/Aths/Lignee686	0.464345	336.007	4.67909	46.8092	6364.01	1511.05	15.2235	118.52	3716.7	1542.03	243.844	0.447677	16.1471
AM-176	SBYT3-1010_2014: ICARDA-Breeding program	SBYT3-1010	Low Input	Breeding lines	6	Aths/Lignee686/4/Avt/Attiki//Aths/3/Giza121/Pue	7.87358	370.665	3.12101	23.258	5376.03	1701.02	13.0921	211.966	4208.5	1182.34	386.745	1.23402	22.6697
AM-177	SBYT3-1011_2014: ICARDA-Breeding program	SBYT3-1011	Low Input	Breeding lines	6	Rihane-03/3/As46/Aths*2//Aths/Lignee686/4/Alanda-01	3.10662	365.085	3.19326	32.5247	4690.66	1388.47	11.0296	247.411	2704.88	1387.31	154.688	1.03131	12.7424
AM-178	SBYT3-1016_2014: ICARDA-Breeding program	SBYT3-1016	Low Input	Breeding lines	6	Rihane-03/3/As46/Aths*2//Aths/Lignee686/4/Alanda-01	2.77661	484.225	2.5337	37.1311	5382.41	1253.42	11.7273	253.419	3548.84	1180.2	145.668	1.19251	18.5246
AM-179	SBYT3-1018_2014: ICARDA-Breeding program	SBYT3-1018	Low Input	Breeding lines	6	Lignee527/Chn-01//Alanda/3/As57/Kc	2.87459	372.941	3.3907	44.3682	4744.53	1689.65	13.9869	236.002	3415.64	1371.81	303.311	1.11371	19.8798
AM-180	SBYT3-1104_2014: ICARDA-Breeding program	SBYT3-1104	Low Input	Breeding lines	6	Avt/Attiki//M-Att-73-337-1/3/Aths/Lignee686/5/AwBlack/Aths//Arar/3/9Cr279-07/Roho/4/Aths	3.45452	306.836	2.80513	26.8685	5251.2	1348.44	10.7577	270.17	3267.59	1199.27	153.979	0.98734	15.9626
AM-181	SBYT3-1105_2014: ICARDA-Breeding program	SBYT3-1105	Low Input	Breeding lines	6	Lignee527/Aths//Aths/Lignee686/3/Aths	3.59874	302.524	2.49244	29.4928	4455.75	1324.18	10.311	245.046	3070.41	1139.08	212.53	1.03255	13.4937
AM-182	SBYT3-1115_2014: ICARDA-Breeding program	SBYT3-1115	Low Input	Breeding lines	6	Lignee527/Aths//Aths/Lignee686/3/Aths	1.93059	351.717	3.87179	37.3589	4854.89	1349.87	17.2862	133.267	3212.06	1431.71	187.532	1.07218	13.575
AM-183	SBYT3-1206_2014: ICARDA-Breeding program	SBYT3-1206	Low Input	Breeding lines	6	3201-3/Perugia//Berolina/Weihenstephan173/4/Aths/Lignee686/3/DeirAlla106/Lignee527//Assala	1.88485	440.195	5.29834	35.3742	6090.55	1561.89	13.6296	300.514	3986.09	1567.39	194.107	1.23827	19.4124
AM-184	SBYT3-1215_2014: ICARDA-Breeding program	SBYT3-1215	Low Input	Breeding lines	6	Lignee527/Aths//Aths/Lignee686/3/Alanda	3.2742	469.28	1.90481	34.3262	5826.38	1341.17	12.8146	260.633	4109.3	1599.31	176.725	1.39504	17.6743
AM-185	SBYT3-1216_2014: ICARDA-Breeding program	SBYT3-1216	Low Input	Breeding lines	6	Lignee527/Aths//Aths/Lignee686/3/Alanda	2.1203	486.196	2.89216	34.7021	5367.83	1540.17	13.5615	179.826	4080.86	1331.34	168.798	1.31505	20.0741
AM-186	SBYT3-1218_2014: ICARDA-Breeding program	SBYT3-1218	Low Input	Breeding lines	2	WI2291/4/7028/2759/3/69-82//Ds/Apro	0.675178	374.953	4.26418	46.8353	4167.97	1316.08	15.7895	194.52	3357.39	1327.86	567.17	0.893737	17.296
AM-187	SBYT3-1308_2014: ICARDA-Breeding program	SBYT3-1308	Low Input	Breeding lines	6	Lignee527/NK1272//UL76252/Jaidor/3/Alanda	2.55188	376.877	2.73329	33.5245	5024.62	1509.3	10.5625	143.427	3309.69	1356.56	203.544	0.950733	19.0253
AM-188	SBYT3-1309_2014: ICARDA-Breeding program	SBYT3-1309	Low Input	Breeding lines	6	AwBlack/Aths//Arar/3/9Cr279-07/Roho/4/CompCr229//As46/Pro/3/DeirAlla106//DL71/Strain205	5.13003	411.157	3.41986	34.5553	4704.69	1434.73	15.0026	293.211	3222.77	1308.94	479.029	1.38629	13.98
AM-189	SBYT3-1314_2014: ICARDA-Breeding program	SBYT3-1314	Low Input	Breeding lines	6	Avt/Attiki//M-Att-73-337-1/3/Aths/Lignee686/4/CYDBA89#49/3/Ssn/Bda//Arar	1.64058	309.468	2.13413	27.923	5547.76	1545.6	8.13098	301.496	4112.28	1418.4	175.159	0.904802	21.2588
AM-190	SBYT3-1406_2014: ICARDA-Breeding program	SBYT3-1406	Low Input	Breeding lines	6	Ghinneri(smooth_awns)/5/AwBlack/Aths//Arar/3/9Cr279-07/Roho/4/Aths	8.92677	438.437	3.11755	30.0073	4494.85	1441.6	14.196	174.945	3253.9	1162.56	115.21	1.86658	20.7677
AM-191	SBYT3-1414_2014: ICARDA-Breeding program	SBYT3-1414	Low Input	Breeding lines	6	Ghinneri(smooth_awns)/Alanda	2.71145	453.826	2.92583	31.2381	4548.71	1638.37	12.922	211.299	3299.45	1283.73	155.427	1.23254	18.0626
AM-192	SBYT3-1419_2014: ICARDA-Breeding program	SBYT3-1419	Low Input	Breeding lines	6	Ghinneri(smooth_awns)/Alanda	0.973811	467.334	3.23443	41.4826	5333.25	1476.23	15.4366	241.6	3352.11	1404.71	311.892	1.18918	17.0657
AM-193	SBYT3-1501_2014: ICARDA-Breeding program	SBYT3-1501	Low Input	Breeding lines	6	AwBlack/Aths//Arar/3/9Cr279-07/Roho/6/Alanda-01/5/CI01021/4/CM67/U.Sask.1800//Pro/CM67/3/DL70	2.30424	362.085	2.83926	37.7635	4336.92	1379.55	14.9966	549.022	2977.6	1354.21	222.553	1.02576	13.8612
AM-194	SBYT3-1506_2014: ICARDA-Breeding program	SBYT3-1506	Low Input	Breeding lines	6	Alanda/Hamra/4/Avt/Attiki//M-Att-73-337-1/3/Aths/Lignee686	2.38246	498.976	2.10726	36.5208	6500.37	1465.61	17.923	224.02	4445.41	1604.19	193.929	1.38684	20.2183
AM-195	SBYT3-1510_2014: ICARDA-Breeding program	SBYT3-1510	Low Input	Breeding lines	6	Marar/4/CompCr229//As46/Pro/3/Srs	5.01318	353.64	2.87815	28.0766	6083.11	1645.18	14.1348	236.709	4080.54	1170.74	163.646	1.03049	27.809
AM-196	SBYT3-1511_2014: ICARDA-Breeding program	SBYT3-1511	Low Input	Breeding lines	6	AwBlack/Aths//Arar/3/9Cr279-07/Roho/6/Alanda-01/5/CI01021/4/CM67/U.Sask.1800//Pro/CM67/3/DL70	1.85842	326.804	2.89448	47.1199	4666.85	1225.14	13.7634	261.132	2926.92	1440.56	212.357	0.832863	10.3767
AM-197	SBYT3-1519_2014: ICARDA-Breeding program	SBYT3-1519	Low Input	Variety	6	Rihane 03	0.781206	439.889	3.23589	34.0457	5010.73	1275.76	11.7805	159.028	3642.48	1161.11	135.179	1.00746	18.9329
AM-198	SBYT3-1520_2014: ICARDA-Breeding program	SBYT3-1520	Low Input	Breeding lines	6	AwBlack/Aths//Arar/3/9Cr279-07/Roho/6/Alanda-01/5/CI01021/4/CM67/U.Sask.1800//Pro/CM67/3/DL70/7/Aths	2.76325	616.182	7.74647	27.2604	6259.79	1310.74	9.51229	252.455	3349.49	1365.38	207.285	1.70639	17.1517
AM-199	SBYT3-1607_2014: ICARDA-Breeding program	SBYT3-1607	Low Input	Breeding lines	6	BF891M-617/4/Hma-02//11012-2/CM67/3/Arar/5/BlackTaridaN	6.51865	395.521	3.46558	41.5345	5601.43	1634.92	19.6403	143.046	4488.52	1410.27	37.4486	1.40595	26.5439
AM-200	SBYT3-1619_2014: ICARDA-Breeding program	SBYT3-1619	Low Input	Breeding lines	6	Alanda-0112/Petunia1	1.36601	381.887	3.65915	37.1289	4954.63	2016.84	16.0366	220.862	4363.2	1525.09	51.7421	0.992905	24.9336
AM-201	SBYT3-1711_2014: ICARDA-Breeding program	SBYT3-1711	Low Input	Breeding lines	6	Alanda/5/Aths/4/Pro/TolI//Cer12/TolI/3/5106/6/Aths/7/Giza129	1.34269	475.523	3.8453	47.6155	6091.08	1554.99	15.9512	188.809	4442.19	1455.38	36.6836	0.994124	21.6274
AM-202	SBYT3-1715_2014: ICARDA-Breeding program	SBYT3-1715	High Input	Breeding lines	6	PETUNIA 2/3/AGAVE/SUMBARD400//MARCO/4/PETUNIA 1/5/TRA-B/1038//PETUNIA 1/3/PENCO/6/BLLU	1.126	386.548	3.46186	31.2792	3927.81	1615.35	16.6673	267.714	3418.66	1142.56	60.4736	0.910909	20.2361
AM-203	SBYT3-1808_2014: ICARDA-Breeding program	SBYT3-1808	Low Input	Breeding lines	2	WI3167/6/ANCA/2469//TOJI/3/SHYRI/4/ATACO/5/ALELI/7/Schooner/Babunj//Noor68/Kataf	2.60368	590.173	2.10276	37.824	4935.76	1315.72	13.4348	198.374	3001.52	1306.55	135.932	2.01263	14.0047
AM-204	SBYT3-1810_2014: ICARDA-Breeding program	SBYT3-1810	Low Input	Breeding lines	2	ICNB93-369/IRAN(Kordistan)	1.998	412.436	5.60599	30.0472	4737.77	1652.99	13.3467	160.376	3359.34	1500.27	32.7888	1.11193	18.4507
AM-205	SBYT3-1817_2014: ICARDA-Breeding program	SBYT3-1817	Low Input	Breeding lines	6	Libya/ICNBF8-614/4/Ssn/Badia//Arar/3/Gloria'S'/Copal'S'	5.7388	438.035	3.95014	36.1615	5288.69	1376.22	12.7405	232.656	3369.5	1210.36	183.716	1.45533	19.052
AM-206	14SBNAK-2_2014: ICARDA-Breeding program	14SBNAK-2	Low Input/Naked barley	Breeding lines	2	ICNB-369/WI3295	4.93743	370.318	4.55117	55.7195	5059.7	1729.87	13.1443	327.677	4055.17	1379.7	58.3849	0.894452	25.5127
AM-207	14SBNAK-11_2014: ICARDA-Breeding program	14SBNAK-11	Low Input/Naked barley	Breeding lines	2	Viringa'S//WI2291/WI2269/3/H.spont.38-3/Akrash-01	0.807948	454.932	4.9874	38.3788	4969.3	1615.45	17.7272	168.227	3720.33	1426.02	35.8308	1.03029	20.2507
AM-208	14SBNAK-17_2014: ICARDA-Breeding program	14SBNAK-17	Low Input/Naked barley	Breeding lines	6	DD-21/4/ALISO/CI3909.2//HB602/3/MOLA/SHYRI//ARUPO*2/JET	1.80581	264.27	5.89121	42.8218	5574.08	1550.61	17.6089	169.692	3972.56	1449.67	33.3215	0.781184	26.9801
AM-209	14SBNAK-27_2014: ICARDA-Breeding program	14SBNAK-27	Low Input/Naked barley	Breeding lines	6	WI3180/4/ALISO/CI3909.2//HB602/3/MOLA/SHYRI//ARUPO*2/JET	7.83724	360.555	2.76203	24.5362	4491.07	1378.38	16.0793	107.189	3536	1058.72	28.4362	1.34574	19.2586
AM-210	14SBNAK-28_2014: ICARDA-Breeding program	14SBNAK-28	Low Input/Naked barley	Breeding lines	6	Atahualpa/3/Arar/Lignee527//Zy/DL69	2.23149	339.414	3.38528	36.2103	4267.3	1527.31	18.6852	219.399	3882.78	1364.26	49.4781	1.10752	20.3479
AM-211	14SBNAK-30_2014: ICARDA-Breeding program	14SBNAK-30	Low Input	Breeding lines	6	WI3167/6/ANCA/2469//TOJI/3/SHYRI/4/ATACO/5/ALELI/7/Schooner/Babunj//Noor68/Kataf	1.0471	321.773	4.77956	39.6232	4970.24	1430.59	22.1717	171.137	3354.24	1641.95	45.562	0.827426	13.8133
AM-212	14SBNAK-53_2014: ICARDA-Breeding program	14SBNAK-53	Low Input/Naked barley	Breeding lines	2	Rt013/Nainaa/4/Lignee527/Chn-01//Gustoe/3/Atahualpa	1.23729	280.511	6.5155	42.393	5525.49	1595.4	14.9772	135.743	4435.95	1396.75	41.2718	0.666584	29.447
AM-213	14SBNAK-55_2014: ICARDA-Breeding program	14SBNAK-55	High Input/Naked barley	Breeding lines	6	PETUNIA 1/5/POST/COPAL//GLORIA-BAR/COME/3/SIND89A-148/4/CARDO/6/GLORIA-BAR/COPAL//BLLU/3/PETUNIA 1/7/PINON	2.31416	435.789	2.42711	29.9941	4769.79	1770.81	14.3449	182.687	3470.27	1179.7	186.243	1.11149	18.9865
AM-214	14SBNAK-64_2014: ICARDA-Breeding program	14SBNAK-64	Low Input/Naked barley	Breeding lines	6	Aths/Lignee686/5/Alanda-01/4/WI2291/3/Api/CM67//L2966-69/6/Atahualpa/7/CANELA/GOB//ALELI	2.0004	374.525	4.69271	39.4166	4019.37	1908.53	17.6538	550.866	4003.17	1520.56	28.0948	1.03276	22.592
AM-215	14SBNAK-66_2014: ICARDA-Breeding program	14SBNAK-66	Low Input/Naked barley	Breeding lines	6	WI3159/5/MOLA/SHYRI//ARUPO*2/JET/3/ALELI/4/MOLA/SHYRI//ARUPO*2/JET/3/CONDOR-BAR	1.58894	332.857	4.44851	39.989	4565.89	1513.52	15.6507	269.551	3355.22	1648.07	103.884	0.751932	16.7191
AM-216	14SBNAK-68_2014: ICARDA-Breeding program	14SBNAK-68	High Input/Naked barley	Breeding lines	2	LIMON/BICHY2000/4/AZAF/3/ARUPO/K8755//MORA	1.56138	326.576	5.48894	45.5932	6167.4	1388.24	13.573	166.009	3811.28	1621.05	23.4843	0.990922	15.8827
AM-217	14SBNAK-82_2014: ICARDA-Breeding program	14SBNAK-82	High Input/Naked barley	Breeding lines	6	Arupo'S'12/3/PI002325/Maf102//Cossack/4/Viringa'S'/5/Atahualpa	1.61803	356.789	3.99931	25.8608	4989.93	1519.83	13.546	267.815	3840.48	1209.1	35.0637	1.14621	23.3442
AM-218	14SBNAK-91_2014: ICARDA-Breeding program	14SBNAK-91	Low Input/Naked barley	Breeding lines	6	ICNB93-369/IRAN(Kordistan)	5.86265	394.124	4.97058	34.657	4786.21	1518.53	12.6521	192.098	3672.69	1078.17	264.341	1.42009	19.3825
AM-219	14SBNAK-101_2014: ICARDA-Breeding program	14SBNAK-101	Low Input/high input/Naked barley	Breeding lines	6	Atahualpa//Alanda-01/Hamra/3/Keel	2.76436	324.516	4.0782	29.2655	4573.08	1558.26	16.9515	234.345	3570.35	1368.08	25.33	0.906492	23.0892
AM-220	14SBNAK-108_2014: ICARDA-Breeding program	14SBNAK-108	High Input/Naked barley	Breeding lines	6	BICHY 2000(6H)/ZIGZIG	3.50557	539.22	2.23753	32.7296	4284.71	1594.78	12.0001	225.637	3067.95	1112.83	295.813	2.03744	16.1672
AM-221	14SBNAK-123_2014: ICARDA-Breeding program	14SBNAK-123	High Input/Naked barley	Breeding lines	6	TOCTE/PETUNIA 2//PETUNIA 1	3.39253	405.558	2.52956	26.7076	4937.9	1486.45	12.5352	203.356	3699.68	1079.62	120.916	1.6156	20.3337
AM-222	14SBNAK-129_2014: ICARDA-Breeding program	14SBNAK-129	Low Input/Naked barley	Breeding lines	6	WI3167/6/ANCA/2469//TOJI/3/SHYRI/4/ATACO/5/ALELI/7/Schooner/Babunj//Noor68/Kataf	0.874436	380.416	2.74005	54.1279	4774.99	1310.57	13.9453	187.864	3401.55	1405.99	175.111	0.761703	14.8348
AM-223	14SBNAK-131_2014: ICARDA-Breeding program	14SBNAK-131	Low Input/Naked barley	Breeding lines	6	Avt/Attiki//M-Att-73-337-1/3/Aths/Lignee686/4/F6NB2_Khomes	1.1742	368.942	2.95366	39.5601	5068.11	1217.21	12.589	222.96	2565.89	1258.09	195.781	0.827872	15.1657
AM-224	14SBNAK-135_2014: ICARDA-Breeding program	14SBNAK-135	High Input/Naked barley	Breeding lines	6	DD-21/4/ALISO/CI3909.2//HB602/3/MOLA/SHYRI//ARUPO*2/JET	6.52774	501.377	3.80221	35.439	4718.97	1607.48	17.7911	107.38	4788.39	1164.78	50.7832	1.38717	27.8643
AM-225	14SBNAK-139_2014: ICARDA-Breeding program	14SBNAK-139	Low Input/Naked barley	Breeding lines	2	DD-21/3/Harmal-02/ArabiAbiad//ER/Apm	4.43269	374.012	6.35138	54.167	5225.33	1470.36	14.8983	232.057	3430.61	1287.64	44.9582	1.12381	20.0322
AM-226	14SBNAK-142_2014: ICARDA-Breeding program	14SBNAK-142	Low Input/Naked barley	Breeding lines	6	WI3167/6/ANCA/2469//TOJI/3/SHYRI/4/ATACO/5/ALELI/7/Schooner/Babunj//Noor68/Kataf	2.89873	379.829	3.69566	41.7035	5079.33	1547.94	16.6973	215.284	3771.8	1417.44	41.0574	0.988045	18.1299
AM-227	14SBNAK-144_2014: ICARDA-Breeding program	14SBNAK-144	High Input/Naked barley	Breeding lines	6	Arupo'S'12/3/PI002325/Maf102//Cossack/4/Viringa'S'/5/WI3180	2.49903	454.679	3.46264	38.5883	4593.41	1470.59	16.8529	243.239	3397.24	1463.42	34.1022	1.90874	17.3992
AM-228	14SBNAK-147_2014: ICARDA-Breeding program	14SBNAK-147	High Input/Naked barley	Breeding lines	2	DD-21/Orzo	3.63458	339.688	6.493	48.8497	5540.3	1785.33	13.9453	149.872	5171.75	1659.82	196.371	1.05798	38.1145
AM-229	14SBNAK-148_2014: ICARDA-Breeding program	14SBNAK-148	High Input/Naked barley	Breeding lines	2	Alanda/Zafraa//Gloria'S'/Copal'S'/3/F6NB_7	0.893803	230.106	3.84941	34.9789	4149.49	1268.85	13.637	76.157	2750.85	1354.73	225.559	0.466546	13.7321
AM-230	CB-HIB-1_2014: ICARDA-Breeding program	CB-HIB-1	Low Input/High Input	Variety	6	Alanda 01	4.56392	398.963	4.86805	37.0717	5230.86	1538.63	12.5125	169.853	3577.65	1435.54	178.527	1.38372	21.9978
AM-231	CB-HIB-3_2014: ICARDA-Breeding program	CB-HIB-3	Low Input	Variety	2	WI2291	2.53312	390.445	5.55681	42.3279	4612.77	1490.56	14.1752	226.705	3418.36	1505.64	464.19	1.11811	19.7104
AM-232	CB-HIB-4_2014: ICARDA-Breeding program	CB-HIB-4	Low Input	Variety	2	Harmal	1.49054	412.087	3.93813	33.9111	4617.31	1197.3	11.2073	185.671	2876.03	1289.57	253.497	1.09156	16.062
AM-233	CB-HIB-5_2014: ICARDA-Breeding program	CB-HIB-5	Low Input	Variety	2	Nawair-01	2.78137	404.679	3.20611	36.9972	5028.77	1487.11	14.1058	138.363	3542.95	1297.24	301.268	1.50608	14.9504
AM-234	CB-HIB-6_2014: ICARDA-Breeding program	CB-HIB-6	Low Input	Variety	6	Momtaz	2.64556	243.343	3.76302	31.8875	5406.58	1377.82	13.3805	184.011	3253.95	1331.69	245.324	0.745184	19.13
AM-235	CB-HIB-7_2014: ICARDA-Breeding program	CB-HIB-7	Low Input	Variety	6	Manal	0.626265	253.39	4.46824	37.9513	4866.39	1369.94	13.4501	141.249	2953.7	1491.07	178.628	0.666851	14.148
AM-236	CB-HIB-8_2014: ICARDA-Breeding program	CB-HIB-8	High Input	Breeding lines	6	P.STO/3/LBIRAN/UNA80//LIGNEE640/4/BLLU/5/PETUNIA 1	1.20052	262.928	4.16215	32.4571	6048.44	1288.71	11.5522	111.151	4374.94	1403.8	174.553	0.707478	24.4125
AM-237	CB-HIB-10_2014: ICARDA-Breeding program	CB-HIB-10	High Input	Breeding lines	6	H96109010	2.57248	328.113	2.84855	29.911	4341.47	1305.83	12.5259	208.672	2877.24	880.752	33.632	0.92704	19.2896
AM-238	CB-HIB-11_2014: ICARDA-Breeding program	CB-HIB-11	High Input	Breeding lines	6	H96117004	1.57279	657.093	2.81086	37.5503	5519.31	1318.93	10.6781	425.801	3361.97	1241.64	347.338	1.58468	20.6818
AM-239	CB-HIB-20_2014: ICARDA-Breeding program	CB-HIB-20	High Input	Variety	6	M122 (Quest)	Missing	Missing	Missing	Missing	Missing	Missing	Missing	Missing	Missing	Missing	Missing	Missing	Missing
AM-240	CB-HIB-30_2014: ICARDA-Breeding program	CB-HIB-30	High Input/low input	Breeding lines	6	PENCO/CHEVRON-BAR	0.730813	354.972	5.26983	39.0622	4499.74	1834.01	17.6995	143.093	3892.63	1652.03	44.0373	0.590219	23.2231
AM-241	CB-HIB-31_2014: ICARDA-Breeding program	CB-HIB-31	High Input/low input	Variety	6	PETUNIA 1	1.06258	366.389	2.81291	33.9484	4534.61	1654.3	16.2969	127.494	3482.59	1430.27	55.917	0.76893	20.2857
AM-242	CB-HIB-32_2014: ICARDA-Breeding program	CB-HIB-32	High Input	Variety	6	CIRUELO	2.24057	518.008	4.40938	56.8939	6434.05	1836.34	17.9147	393.611	4877.45	1585.55	246.42	1.32292	22.3689
AM-243	CB-HIB-36_2014: ICARDA-Breeding program	CB-HIB-36	High Input	Breeding lines	6	ESMERALDA/LEGACY/6/P.STO/3/LBIRAN/UNA80//LIGNEE640/4/BLLU/5/PETUNIA 1	1.52358	473.758	3.8095	27.8108	4905.17	1507.92	15.6373	170.465	3021.33	1156.03	155.993	1.07258	18.7762
AM-244	CB-HIB-81_2014: ICARDA-Breeding program	CB-HIB-81	High Input	Breeding lines	6	QUINA/MJA//SCARLETT	4.53193	382.885	5.25018	22.4033	5201.17	1333.91	12.4604	446.917	2861.19	1197.55	167.656	1.18955	17.73
AM-245	CB-HIB-84_2014: ICARDA-Breeding program	CB-HIB-84	High Input	Breeding lines	6	PENCO/CHEVRON-BAR//ATAH92/GOB	2.28001	445.155	6.57634	53.521	5281.45	1625.47	15.9269	163.428	3192.83	1316.85	232.255	1.19473	17.6709
AM-246	CB-HIB-86_2014: ICARDA-Breeding program	CB-HIB-86	High Input	Breeding lines	6	ESMERALDA/3/SLLO/ROBUST//QUINA/4/M104	3.83212	374.606	3.53575	27.8966	4700.07	1358.53	13.8074	68.2235	3814.65	1271.53	242.25	1.38629	20.7766
AM-247	CB-HIB-92_2014: ICARDA-Breeding program	CB-HIB-92	High Input	Breeding lines	6	ATACO/BERMEJO//HIGO/3/CALI92/ROBUST/4/PETUNIA1/5/PETUNIA/CHINIA/3/ATACO/BERMEJO//HIGO/6/ZIGZIG/3/M9846//CCXX14.ARZ3/PACO	5.07437	363.235	2.50998	33.0794	4826.64	1288.57	14.3658	199.133	2985.73	1291	228.996	1.11284	13.4304
AM-248	CB-HIB-93_2014: ICARDA-Breeding program	CB-HIB-93	High Input	Breeding lines	6	P.STO/3/LBIRAN/UNA80//LIGNEE640/4/BLLU/5/PETUNIA 1/6/M9846//CCXX14.ARZ3/PACO/3/PALTON	0.740332	458.363	3.07341	25.362	4632.61	1453.85	14.8591	268.735	3159.03	1358.69	276.404	1.1867	17.423
AM-249	CB-HIB-95_2014: ICARDA-Breeding program	CB-HIB-95	High Input	Breeding lines	6	P.STO/3/LBIRAN/UNA80//LIGNEE640/4/BLLU/5/PETUNIA 1/6/ZIGZIG/4/EGYPT4/TERAN78//P.STO/3/QUINA	2.19327	417.71	3.6947	27.3356	5193.99	1454.33	13.1883	166.634	3622.1	1406.79	156.949	0.98734	20.6125
AM-250	CB-HIB-97_2014: ICARDA-Breeding program	CB-HIB-97	High Input	Breeding lines	6	P.STO/3/LBIRAN/UNA80//LIGNEE640/4/BLLU/5/PETUNIA 1/6/M111/7/LEGACY/3/SVANHALSBAR/MSEL//AZAF/GOB24DH	4.21593	698.774	6.17785	39.2715	5105.38	1544.12	16.6607	329.987	3879.09	1389.44	159.37	1.91525	25.4269
AM-251	CB-HIB-99_2014: ICARDA-Breeding program	CB-HIB-99	High Input	Breeding lines	6	SARA1-BAR/CAPUCHONA 20	1.27702	443.357	2.9235	25.4876	5132.82	1432.3	13.2363	279.303	2969.76	1295.95	246.07	1.1886	14.689
AM-252	CB-HIB-101_2014: ICARDA-Breeding program	CB-HIB-101	High Input	Breeding lines	6	PETUNIA 2/M111	0.396947	335.124	2.80513	28.3972	3532.4	1258.03	12.2908	234.695	2400.74	1199.79	179.07	0.666851	14.6394
AM-253	CB-HIB-103_2014: ICARDA-Breeding program	CB-HIB-103	Low Input/Landrace	Variety	6	C-84	2.19706	426.18	3.04191	33.7978	3973.2	1597.47	13.8928	254.889	3197.73	1512.91	242.385	1.07215	19.3123
AM-254	CB-HIB-104_2014: ICARDA-Breeding program	CB-HIB-104	Low Input/Landrace	Variety	6	C 50	2.7735	396.9	2.96325	39.059	4436.45	1358.77	14.2119	199.499	3392.65	1524	308.793	1.03196	18.2223
AM-255	CB-HIB-105_2014: ICARDA-Breeding program	CB-HIB-105	Low Input/Landrace	Variety	6	K 12	2.34615	436.535	2.84381	34.4269	4513.58	1365.32	15.5441	295.922	2978.39	1392.27	186.216	1.30783	17.3614
AM-256	CB-HIB-106_2014: ICARDA-Breeding program	CB-HIB-106	Low Input/Landrace	Variety	6	K 14	1.90381	499.682	4.78972	57.0928	5307.98	1456.74	19.4092	164.332	3928.43	1379.62	208.336	0.859773	20.2325
AM-257	CB-HIB-107_2014: ICARDA-Breeding program	CB-HIB-107	High Input/Irrigated/Feed	Variety	6	JYOTI	0.592144	533.016	2.62509	38.3759	4273.01	1239.69	15.1328	205.288	2921.86	1281.96	285.104	1.0667	12.3635
AM-258	CB-HIB-108_2014: ICARDA-Breeding program	CB-HIB-108	Low Input/Feed	Variety	6	LAKHAN (K226)	3.01253	508.803	2.98492	30.105	4519.3	1403.9	15.9902	355.946	2921.61	1338.41	193.828	1.65669	17.3269
AM-259	CB-HIB-109_2014: ICARDA-Breeding program	CB-HIB-109	High Input/Irrigated/Feed	Variety	6	PL 172	4.69108	618.052	5.38817	39.2022	5489.43	1265.25	14.1805	276.293	3454.47	1502.63	178.718	1.67613	18.792
AM-260	CB-HIB-110_2014: ICARDA-Breeding program	CB-HIB-110	Low Input/Feed	Variety	6	GEETANJALI (K1149)	1.83561	490.872	3.38629	45.4979	4235.57	1406.16	18.5869	212.289	3323.85	1373.79	37.8461	1.36296	18.437
AM-261	CB-HIB-111_2014: ICARDA-Breeding program	CB-HIB-111	High Input/Irrigated/Feed	Variety	6	PL426	2.93027	346.154	4.10384	27.1485	5410.69	1541.39	12.1522	501.123	3894.21	1426.15	209.322	0.912397	23.9102
AM-262	CB-HIB-112_2014: ICARDA-Breeding program	CB-HIB-112	Low Input/Feed	Variety	6	RD2508	2.14068	499.709	2.10528	22.2897	4694.16	1093.12	10.248	172.117	2372.82	996.831	176.102	1.22404	13.4072
AM-263	CB-HIB-113_2014: ICARDA-Breeding program	CB-HIB-113	High Input/Irrigated/Feed	Variety	6	RD2552	3.38982	420.291	2.91839	25.5037	4670.05	1406.95	14.0636	180.296	2731.94	1047.17	181.439	1.40595	16.5661
AM-264	CB-HIB-114_2014: ICARDA-Breeding program	CB-HIB-114	High Input/Irrigated/Feed	Variety	6	RD2624	3.14619	611.073	3.69011	39.5178	5170.27	1882.42	16.4291	279.373	3716.67	1346.46	316.482	1.79468	22.9439
AM-265	CB-HIB-115_2014: ICARDA-Breeding program	CB-HIB-115	High Input/Irrigated/Feed	Variety	6	RD2592	3.02733	531.002	3.34566	44.649	5558.9	1627.5	13.2256	184.793	3430.77	1211.1	173.988	1.31243	15.7663
AM-266	CB-HIB-116_2014: ICARDA-Breeding program	CB-HIB-116	High Input/Irrigated/Salinity tolerant	Variety	6	NDB1173	3.30591	410.466	2.95511	33.6674	5367.14	1305.49	11.4391	259.984	2854.46	1284.85	184.065	1.11336	17.5962
AM-267	CB-HIB-117_2014: ICARDA-Breeding program	CB-HIB-117	Low Input/Feed	Variety	6	RD2660	4.14331	520.468	2.73767	31.0289	4047.71	1636.93	14.7158	236.61	2959.46	1149.45	257.661	1.63655	20.2993
AM-268	CB-HIB-118_2014: ICARDA-Breeding program	CB-HIB-118	High Input/Irrigated/Malting	Variety	2	DWR28	4.14249	509.926	3.19708	32.2546	4212.28	1640.82	18.6751	341.533	3118.79	1356.13	340.476	1.395	17.4219
AM-269	CB-HIB-119_2014: ICARDA-Breeding program	CB-HIB-119	High Input/Irrigated/Malting	Variety	2	RD2668	1.06599	378.246	3.62565	38.1078	4909.82	1395.81	18.1807	525.845	2980.97	1356.07	393.275	0.993638	13.9454
AM-270	CB-HIB-120_2014: ICARDA-Breeding program	CB-HIB-120	High Input/Irrigated/Malting	Variety	2	DWRUB52	2.0039	432.643	5.45729	43.1975	3698.09	1441	20.0052	299.307	2866.1	1458.65	512.8	1.05181	15.7864
AM-271	NBYT13-1_2014: ICARDA-Breeding program	NBYT13-1	Low Input/Naked barley	Breeding lines	2	ICNB93-369/IRAN(Kordistan)	1.37271	301.286	4.79164	50.1199	4324.9	1463.27	17.9541	263.518	3288.24	1522.6	50.4291	0.596868	18.8697
AM-272	NBYT13-2_2014: ICARDA-Breeding program	NBYT13-2	Low Input/Naked barley	Breeding lines	2	WI3167/6/ANCA/2469//TOJI/3/SHYRI/4/ATACO/5/ALELI/7/LEO-B/CANELA//GOB96DH	1.80292	311.884	3.77373	39.8661	4926.95	1525.51	19.079	247.22	3987.08	1552.35	35.6773	0.904802	26.0872
AM-273	NBYT13-3_2014: ICARDA-Breeding program	NBYT13-3	Low Input/Naked barley	Breeding lines	2	WI3167/6/ANCA/2469//TOJI/3/SHYRI/4/ATACO/5/ALELI/7/LEO-B/CANELA//GOB96DH	1.84277	309.02	5.41118	50.739	4562.17	1637.86	17.7274	146.9	3490.22	1560.23	38.3922	1.07086	20.5939
AM-274	NBYT13-4_2014: ICARDA-Breeding program	NBYT13-4	Low Input/Naked barley	Breeding lines	2	WI3167/4/ALISO/CI3909.2//HB602/3/MOLA/SHYRI//ARUPO*2/JET	2.26608	397.261	5.34924	44.9706	4732.73	1494.41	13.7272	92.9321	3704.23	1566.11	20.1392	1.14575	22.5423
AM-275	NBYT13-5_2014: ICARDA-Breeding program	NBYT13-5	Low Input/Naked barley	Breeding lines	2	WI3167/6/ANCA/2469//TOJI/3/SHYRI/4/ATACO/5/ALELI/7/LEO-B/CANELA//GOB96DH	1.92391	243.482	3.92832	32.5472	4483.97	1534.58	14.8091	105.097	3704.43	1273.56	46.7802	0.654809	21.8681
AM-276	NBYT13-6_2014: ICARDA-Breeding program	NBYT13-6	Low Input/Naked barley	Breeding lines	2	WI3167/6/ANCA/2469//TOJI/3/SHYRI/4/ATACO/5/ALELI/7/Schooner/Babunj//Noor68/Kataf	2.38628	316.519	4.04603	32.0746	5171.09	1540.95	16.305	214.078	4608.36	1511.13	37.5446	0.907944	27.7041
AM-277	NBYT13-7_2014: ICARDA-Breeding program	NBYT13-7	Low Input/Naked barley	Breeding lines	2	WI3257/4/ALISO/CI3909.2//HB602/3/MOLA/SHYRI//ARUPO*2/JET	1.76586	316.881	5.11124	40.8664	5742.03	1815.5	17.0386	154.414	4827.19	1523.4	48.5017	0.739792	27.5715
AM-278	NBYT13-8_2014: ICARDA-Breeding program	NBYT13-8	Low Input/Naked barley	Breeding lines	2	DD-21/Mundah	1.56013	549.283	2.88408	41.8242	6386.85	1880.47	16.3003	253.41	4423.01	1779.83	32.7095	1.15075	26.841
AM-279	NBYT13-9_2014: ICARDA-Breeding program	NBYT13-9	Low Input/Naked barley	Breeding lines	2	WI3167/6/ANCA/2469//TOJI/3/SHYRI/4/ATACO/5/ALELI/7/Schooner/Babunj//Noor68/Kataf	2.25296	369.6	5.96941	36.293	3821.12	1549.98	18.0322	240.089	3144.84	1425.59	35.3724	1.23976	18.3911
AM-280	NBYT13-10_2014: ICARDA-Breeding program	NBYT13-10	Low Input/Naked barley	Breeding lines	2	WI3167/6/ANCA/2469//TOJI/3/SHYRI/4/ATACO/5/ALELI/7/Schooner/Babunj//Noor68/Kataf	1.24222	307.511	5.58139	56.9167	4969.17	1666.12	19.3877	176.124	4568.65	1579.06	39.5675	0.598063	21.438
AM-281	NBYT13-11_2014: ICARDA-Breeding program	NBYT13-11	Low Input/Naked barley	Breeding lines	2	Viringa'S/Tarida	3.11154	612.603	3.92602	44.4327	4442.96	1810.11	18.6203	222.634	3932.32	1456.49	71.6174	1.35478	25.5065
AM-282	NBYT13-12_2014: ICARDA-Breeding program	NBYT13-12	Low Input/Naked barley	Breeding lines	2	Viringa'S//WI2291/WI2269/3/H.spont.38-3/Akrash-01	2.86885	447.902	3.30738	44.4027	5200.14	1568.24	12.6467	89.139	3979.02	1582.57	25.647	1.31243	19.0253
AM-283	NBYT13-13_2014: ICARDA-Breeding program	NBYT13-13	Low Input/Naked barley	Breeding lines	6	Aths/Lignee686//Orge905/Cr289-53-2/3/F6NB_7	4.77155	351.906	6.34002	41.4038	4672.82	1555.78	17.7149	227.358	4388.15	1576.71	41.609	1.59693	21.8089
AM-284	IG:154361-1_2014: ICARDA-Gene Bank	IG:154361-1	Landrace/Extra Early (Belarus)	Collection	6	IG:154361	1.00725	338.871	9.29168	26.8363	4919.48	1104.58	10.1846	317.875	2272.96	1065.22	196.057	0.90613	10.8837
AM-285	IG:153841-2_2014: ICARDA-Gene Bank	IG:153841-2	Landrace/Extra Early (Nepal)	Collection	6	IG:153841	2.61055	397.828	5.5059	32.986	5577.02	1484.29	16.3471	342.661	3672.65	1537.08	531.998	1.50633	19.8326
AM-286	IG:153839-3_2014: ICARDA-Gene Bank	IG:153839-3	Landrace/Extra Early (Nepal)	Collection	6	IG:153839	1.5423	410.369	1.91403	41.4426	5699.39	1280.27	15.9053	258.125	4200.24	1673.84	181.253	1.06661	23.0514
AM-287	IG:153842-4_2014: ICARDA-Gene Bank	IG:153842-4	Landrace/Extra Early (Nepal)	Collection	6	IG:153842	2.16393	362.155	2.77841	41.2501	5656.8	1435.72	19.5398	208.38	3769.87	1406.59	211.988	0.832197	17.4256
AM-288	IG:155491-5_2014: ICARDA-Gene Bank	IG:155491-5	Landrace/Extra Early (Armenia)	Collection	2	IG:155491	4.28206	415.972	4.28465	43.5757	5712.25	1492.85	15.2497	264.87	3870.06	1554.03	237.42	1.23877	24.5231
AM-289	IG:154360-6_2014: ICARDA-Gene Bank	IG:154360-6	Landrace/Extra Early (Belarus)	Collection	6	IG:154360	1.80413	354.731	5.60339	36.2311	5446.1	1260.93	9.85345	336.769	3245.6	1166.57	202.034	0.793987	16.0491
AM-290	IG:153846-7_2014: ICARDA-Gene Bank	IG:153846-7	Landrace/Extra Early (Nepal)	Collection	6	IG:153846	1.16611	328.215	3.88458	38.6866	4765.96	1695.59	12.2319	144.45	3726.16	1605.07	21.3387	0.710172	18.3416
AM-291	IG:153849-8_2014: ICARDA-Gene Bank	IG:153849-8	Landrace/Extra Early (Nepal)	Collection	6	IG:153849	2.04553	353.968	2.39541	42.3317	5744.85	1366.57	17.7307	174.667	4432.05	1546.18	148.064	0.75043	22.7572
AM-292	IG:154357-9_2014: ICARDA-Gene Bank	IG:154357-9	Landrace/Extra Early (Belarus)	Collection	6	IG:154357	1.89303	394.029	4.7065	42.2636	5656.13	1284.97	12.5131	266.648	2928.7	1364.18	430.9	1.07261	15.2301
AM-293	IG:156345-10_2014: ICARDA-Gene Bank	IG:156345-10	Landrace/Extra Early (Mangolia)	Collection	6	IG:156345	2.43205	488.254	4.33902	36.6296	4339.69	1621.36	18.1587	245.34	3587.52	1541.81	283.729	1.0307	23.4001
AM-294	IG:155493-11_2014: ICARDA-Gene Bank	IG:155493-11	Landrace/Extra Early (Armeia)	Collection	6	IG:155493	Missing	Missing	Missing	Missing	Missing	Missing	Missing	Missing	Missing	Missing	Missing	Missing	Missing
AM-295	IG:156369-12_2014: ICARDA-Gene Bank	IG:156369-12	Landrace/Extra Early (Mangolia)	Collection	6	IG:156369	4.02138	381.491	6.43046	38.145	5848.86	1413.86	17.274	295.165	3520.81	1370.99	202.031	1.38573	17.862
AM-296	SFNB14-1_2014: Australia	SFNB14-1	High input	Collection	2	MXB.486	1.80557	461.008	3.66059	40.7172	4852.58	1320.7	12.7201	154.106	3228.25	1278.57	246.903	1.71636	17.9749
AM-297	SFNB14-2_2014: Australia	SFNB14-2	High input/ low input	Variety	2	Stirling	2.07893	389.811	3.57958	33.1948	4288.69	1792.78	17.1444	226.554	3651.43	1363.07	271.993	1.03235	23.3599
AM-298	SFNB14-3_2014: Australia	SFNB14-3	Landrace	Collection	2	CI19819	Missing	Missing	Missing	Missing	Missing	Missing	Missing	Missing	Missing	Missing	Missing	Missing	Missing
AM-299	SFNB14-4_2014: Australia	SFNB14-4	Low input	Variety	2	Esperance Orge 289	1.04196	304.001	3.52319	29.5315	4419.98	1145.07	11.8835	117.842	3511.56	1138.89	213.954	0.663741	17.1653
AM-300	SFNB14-5_2014: Australia	SFNB14-5	High input/ low input	Variety	6	Arimont	Missing	Missing	Missing	Missing	Missing	Missing	Missing	Missing	Missing	Missing	Missing	Missing	Missing
AM-301	SFNB14-6_2014: Australia	SFNB14-6	High input/ low input	Variety	6	Kombar	4.56754	504.889	5.32676	51.4507	5784.83	1437.84	13.8488	158.781	4040.18	1373.88	175.664	1.25599	26.9005
AM-302	SFNB14-7_2014: Australia	SFNB14-7	High input/ low input	Collection	2	TR03189	1.93627	408.996	3.51475	33.7564	5152.89	1180.1	13.6907	185.336	3551.1	1259.55	185.574	1.08959	19.8279
AM-303	SFNB14-8_2014: Australia	SFNB14-8	High Input	Variety	2	Baudin	1.08767	300.471	6.18774	32.5502	5745.66	1822.44	14.0199	323.527	4217.48	1272.34	288.308	0.912003	23.8744
AM-304	SFNB14-9_2014: Australia	SFNB14-9	Landrace	Collection	2	CI3576	3.10166	329.988	7.24813	43.7596	5390.22	1410.42	14.162	141.119	3870.97	1414.65	171.786	0.946423	23.1515
AM-305	SFNB14-10_2014: Australia	SFNB14-10	Landrace	Collection	2	CI11456	1.87283	414.294	5.18508	44.0191	5072.33	1442.19	14.8361	146.755	4137.91	1472.56	530.202	0.893737	33.2192
AM-306	SFNB14-11_2014: Australia	SFNB14-11	High Input	Variety	6	Steptoe	0.97537	397.983	2.53066	36.421	5120.23	1247.82	10.6228	253.682	3461.81	1078.22	199.355	0.762617	17.9242
AM-307	SFNB14-12_2014: Australia	SFNB14-12	High input/low input	Variety	6	Beecher	Missing	Missing	Missing	Missing	Missing	Missing	Missing	Missing	Missing	Missing	Missing	Missing	Missing
AM-308	SFNB14-13_2014: Australia	SFNB14-13	High input/low input	Variety	6	Cape	1.40402	474.238	3.76967	32.1955	4354.03	1503.09	13.5452	190.105	2990.35	1315.47	153.966	1.19282	18.7299
AM-309	SFNB14-14_2014: Australia	SFNB14-14	Low Input	Collection	2	BYDV-013	1.80653	298.488	6.12826	60.11	4526.02	1520.77	16.6152	278.038	3891.69	1618.92	27.3405	0.823202	18.2049
AM-310	SFNB14-15_2014: Australia	SFNB14-15	Landrace	Collection	6	CI5286	1.70717	306.868	4.51392	46.3845	4860.11	1334.27	12.5259	271.174	3643.03	1572.27	201.949	0.663476	19.8315
AM-311	SFNB14-16_2014: Australia	SFNB14-16	High input/low input	Variety	2	Chebec	1.58112	341.796	6.0129	43.4117	5692.64	1491.58	14.2296	129.887	4152.85	1684.71	225.389	0.866809	20.4909
AM-312	SFNB14-17_2014: Australia	SFNB14-17	High input/low input	Variety	6	Jet	Missing	Missing	Missing	Missing	Missing	Missing	Missing	Missing	Missing	Missing	Missing	Missing	Missing
AM-313	SFNB14-18_2014: Australia	SFNB14-18	High Input	Variety	2	Skiff	1.52065	328.796	3.89551	32.1175	4894.71	1442.7	13.7559	306.478	3498.86	1538.7	514.642	0.780872	25.113
AM-314	SFNB14-19_2014: Australia	SFNB14-19	High input/low input	Variety	2	Yangsimai 3	2.42964	367.119	2.96444	32.1015	5249.34	1524.11	16.0703	284.439	3943.6	1365.1	225.98	0.951903	24.9409
AM-315	SFNB14-20_2014: Australia	SFNB14-20	High Input	Variety	2	Herta	4.94139	356.591	4.16458	31.0047	5451.39	1343.06	17.3834	159.187	4310.25	1158.7	33.9698	0.961139	29.656
AM-316	SFNB14-21_2014: Australia	SFNB14-21	High Input	Variety	2	Summit	1.03262	300.765	3.81582	33.6808	5045.51	1357.42	12.4817	118.793	3404.44	1193.96	184.5	0.655595	20.8505
AM-317	SFNB14-22_2014: Australia	SFNB14-22	High Input	Variety	2	Galleon	3.23715	313.47	3.49742	29.3187	5307.24	1383.87	13.4131	91.6523	3911.85	1236.99	199.632	0.791597	28.0378
AM-318	SFNB14-23_2014: Australia	SFNB14-23	High Input	Variety	2	Keel	5.30859	379.46	4.02804	31.6591	4633.36	1235.86	16.009	254.41	3350.8	1306.71	366.431	1.23453	20.0078
AM-319	SFNB14-24_2014: Australia	SFNB14-24	High input/low input	Variety	2	Yagan	4.95939	357.449	3.2674	25.8937	4557.36	1426.5	16.3297	166.064	3297.96	1325.93	250.226	1.03237	16.7674
AM-320	SFNB14-25_2014: Australia	SFNB14-25	High input/low input	Collection	2	TR250	0.32191	299.833	3.80215	44.2725	4632.4	1178.34	14.012	210.286	2564.4	1455.85	174.88	0.550217	13.6718
AM-321	SFNB14-26_2014: Australia	SFNB14-26	Low Input	Collection	6	ICARDA SN326	0.932023	457.811	2.80513	33.4078	4824.84	1284.69	13.2631	229.529	3473.36	1352.53	145.668	1.22771	18.4577
AM-322	SFNB14-27_2014: Australia	SFNB14-27	Landrace	Collection	6	CI5791	Missing	Missing	Missing	Missing	Missing	Missing	Missing	Missing	Missing	Missing	Missing	Missing	Missing
AM-323	SFNB14-28_2014: Australia	SFNB14-28	High input/low input	Collection	6	KB35	Missing	Missing	Missing	Missing	Missing	Missing	Missing	Missing	Missing	Missing	Missing	Missing	Missing
AM-324	SFNB14-29_2014: Australia	SFNB14-29	Landrace	Collection	6	CI9776	Missing	Missing	Missing	Missing	Missing	Missing	Missing	Missing	Missing	Missing	Missing	Missing	Missing
AM-325	SFNB14-30_2014: Australia	SFNB14-30	Landrace	Variety	6	Haruna Nijo	1.92699	325.077	2.80113	30.6721	4598.12	1351.63	13.4098	132.988	3712.12	1089.36	112.941	0.655857	22.9086
AM-326	SFNB14-31_2014: Australia	SFNB14-31	Landrace	Collection	6	CI7584	2.17398	338.943	4.65752	34.9727	5262.23	1289.7	14.6776	189.566	3132.03	1249.73	161.837	0.828535	17.0208
AM-327	SFNB14-32_2014: Australia	SFNB14-32	High input/low input	Variety	2	Torrens	0.81671	229.514	4.5806	36.3511	4281.7	1339.17	13.8129	138.453	3080.33	1540.62	215.631	0.58626	16.0632
AM-328	SFNB14-33_2014: Australia	SFNB14-33	High input/low input	Variety	6	Coast	4.50641	430.395	4.44661	32.7937	5428.5	1253.35	12.0247	238.638	3707.72	1132.54	216.678	1.09264	29.5718
AM-329	SFNB14-34_2014: Australia	SFNB14-34	Landrace	Collection	6	CI9214	2.0043	268.774	4.01304	33.8615	4742.87	1357.82	11.5924	144.257	3810.22	1114.57	334.07	0.728492	23.3794
AM-330	1GSBSN-12_2014: ICARDA-Breeding program	1GSBSN-12	Low Input	Breeding lines	6	Aths/Lignee686/4/Avt/Attiki//Aths/3/Giza121/Pue	4.94182	360.062	6.95527	30.2825	5989.49	1545.94	13.932	300.826	4642.73	1405.36	205.887	1.11603	26.5477
AM-331	1GSBSN-19_2014: ICARDA-Breeding program	1GSBSN-19	Low Input	Breeding lines	6	Rihane-03/3/Mr25-84/Att//Mari/Aths*3-02/4/Alanda-01	1.78089	321.889	6.42095	34.7933	4965.81	1427.29	12.1991	358.241	3821.77	1532.82	181.707	0.792231	22.5399
AM-332	1GSBSN-21_2014: ICARDA-Breeding program	1GSBSN-21	Low Input	Breeding lines	6	Saida/6/Cita'S'/4/Apm/Rl//Manker/3/Maswi/Bon/5/Copal'S'/7/Malouh/8/Alanda-01	4.89435	385.648	3.62229	39.1221	4471.35	1405.74	14.7163	286.605	3290.2	1284.38	273.472	1.12292	14.4263
AM-333	1GSBSN-31_2014: ICARDA-Breeding program	1GSBSN-31	Low Input	Breeding lines	6	Nadawa/Rhn-03/3/Lignee527/Rihane//Arar	1.68251	400.958	3.46419	31.6668	4515.26	1384.29	11.8666	239.897	3020.4	1435.52	190.568	0.94718	17.178
AM-334	1GSBSN-34_2014: ICARDA-Breeding program	1GSBSN-34	Low Input	Breeding lines	6	Nadawa/Rhn-03//QB813.2	1.71917	293.463	3.11478	32.6083	5043.55	1671.22	14.3006	196.191	3364.01	1397.96	196.697	0.709321	16.5356
AM-335	1GSBSN-109_2014: ICARDA-Breeding program	1GSBSN-109	Low Input	Breeding lines	6	WI2291/Roho//WI2269/3/Arta	1.27396	387.405	2.72342	32.9728	5791.11	1245.67	11.8979	162.103	4329.08	1355.53	178.984	0.865771	23.5991
AM-336	1GSBSN-145_2014: ICARDA-Breeding program	1GSBSN-145	Low Input	Breeding lines	2	Clipper//WI2291*2/WI2269/5/Soufara-02/3/RM1508/Por//WI2269/4/Hml-02/ArabiAbiad//ER/Apm	4.29517	370.859	7.21121	25.0271	5802.37	1545.99	10.2151	131.743	3866.34	1245.38	175.99	1.03111	18.133
Micronutirent analysis of barley check cutlivars in Wetland Research Groups, Biological Sciences at NDSU using ICP-OES							Ba 455.404	Ca 422.673	Cu 324.754	Fe 239.562	K 766.491	Mg 202.647	Mn 257.611	Na 589.592	P 178.287	S 180.731	Si 251.612	Sr 407.771	Zn 213.856
Tichedrette	MP11-11_2014: ICARDA-Breeding program	MP11-11	Low Input	Variety	2	Tichedrette	4.26407	403.481	4.23439	35.2368	5198.54	1804.23	13.6775	113.103	4423.3	1403.23	581.365	0.992905	28.6656
Tichedrette	MP11-11_2014: ICARDA-Breeding program	MP11-11	Low Input	Variety	2	Tichedrette	4.72885	426.367	3.26885	32.0171	4497.03	1507.02	14.9422	170.047	3599.37	1306.39	214.195	1.69697	21.7397
Rihane 03	1GSBYT-121_2014: ICARDA-Breeding program	1GSBYT-121	Low Input	Variety	6	Rihane 03	0.742605	383.115	2.10613	44.1111	4719.56	1229.29	10.8998	176.995	3482.63	1213.8	134.18	0.861838	15.437
Rihane 03	1GSBYT-121_2014: ICARDA-Breeding program	1GSBYT-121	Low Input	Variety	6	Rihane 03	0.819807	496.663	4.36566	23.9803	5301.9	1322.23	12.6613	141.06	3802.33	1108.43	136.179	1.15308	22.4289
Alanda 01	CB-HIB-1_2014: ICARDA-Breeding program	CB-HIB-1	Low Input/High Input	Variety	6	Alanda 01	3.18283	421.987	3.50046	46.7345	4854.44	1571.43	13.3937	117.391	3293.01	1523.35	178.411	1.44588	18.5935
Alanda 01	CB-HIB-1_2014: ICARDA-Breeding program	CB-HIB-1	Low Input/High Input	Variety	6	Alanda 01	5.94502	375.94	6.23563	27.409	5607.28	1505.83	11.6313	222.315	3862.29	1347.73	178.643	1.32155	25.4021
WI2291	CB-HIB-3_2014: ICARDA-Breeding program	CB-HIB-3	Low Input	Variety	2	WI2291	1.39986	359.015	5.18947	43.7595	4614.79	1522.57	14.0363	246.651	3012.76	1667.46	696.855	0.948317	15.0311
WI2291	CB-HIB-3_2014: ICARDA-Breeding program	CB-HIB-3	Low Input	Variety	2	WI2291	3.66637	421.875	5.92415	40.8964	4610.76	1458.55	14.314	206.759	3823.97	1343.82	231.525	1.2879	24.3896
Harmal	CB-HIB-4_2014: ICARDA-Breeding program	CB-HIB-4	Low Input	Variety	2	Harmal	0.815406	282.159	4.03311	28.4562	4333.84	1124.62	10.4335	218.346	2563.4	1192.09	169.149	0.705219	15.8489
Harmal	CB-HIB-4_2014: ICARDA-Breeding program	CB-HIB-4	Low Input	Variety	2	Harmal	2.16566	542.015	3.84315	39.3659	4900.77	1269.98	11.9812	152.997	3188.65	1387.06	337.845	1.47791	16.275
Nawair-01	CB-HIB-5_2014: ICARDA-Breeding program	CB-HIB-5	Low Input	Variety	2	Nawair-01	2.49288	309.973	2.79778	35.0976	5476.92	1547.79	14.6229	115.063	3925.23	1251.11	201.818	0.904802	17.0484
Nawair-01	CB-HIB-5_2014: ICARDA-Breeding program	CB-HIB-5	Low Input	Variety	2	Nawair-01	3.06987	499.384	3.61445	38.8968	4580.62	1426.43	13.5888	161.664	3160.66	1343.37	400.717	2.10736	12.8523
PETUNIA 1	CB-HIB-31_2014: ICARDA-Breeding program	CB-HIB-31	High Input/low input	Variety	6	PETUNIA 1	0.809887	332.653	2.39266	33.8248	4713.21	1749.93	14.7544	97.0967	3636.07	1386.87	83.9321	0.54973	19.6775
PETUNIA 1	CB-HIB-31_2014: ICARDA-Breeding program	CB-HIB-31	High Input/low input	Variety	6	PETUNIA 1	1.31527	400.124	3.23317	34.072	4356.01	1558.67	17.8394	157.892	3329.11	1473.68	27.9018	0.98813	20.8939
JYOTI	CB-HIB-107_2014: ICARDA-Breeding program	CB-HIB-107	High Input/Irrigated/Feed	Variety	6	JYOTI	0.709098	355.686	2.68818	33.0025	3771.13	1249.84	15.2032	201.021	2496.84	1388.58	178.468	0.615169	13.1451
JYOTI	CB-HIB-107_2014: ICARDA-Breeding program	CB-HIB-107	High Input/Irrigated/Feed	Variety	6	JYOTI	0.47519	710.346	2.562	43.7494	4774.89	1229.53	15.0624	209.556	3346.88	1175.34	391.741	1.51824	11.5819
LAKHAN (K226)	CB-HIB-108_2014: ICARDA-Breeding program	CB-HIB-108	Low Input/Feed	Variety	6	LAKHAN (K226)	2.23889	431.908	3.11716	35.3896	4248.43	1230.46	17.2259	374.595	2705.82	1492.36	184.308	1.07304	14.8986
LAKHAN (K226)	CB-HIB-108_2014: ICARDA-Breeding program	CB-HIB-108	Low Input/Feed	Variety	6	LAKHAN (K226)	3.78616	585.699	2.85267	24.8204	4790.17	1577.35	14.7544	337.296	3137.41	1184.47	203.348	2.24033	19.7552
GEETANJALI (K1149)	CB-HIB-110_2014: ICARDA-Breeding program	CB-HIB-110	Low Input/Feed	Variety	6	GEETANJALI (K1149)	1.67322	449.783	3.27244	48.7518	4007.57	1110.15	16.6066	166.156	2908.67	1281.52	36.7734	1.09133	13.6492
GEETANJALI (K1149)	CB-HIB-110_2014: ICARDA-Breeding program	CB-HIB-110	Low Input/Feed	Variety	6	GEETANJALI (K1149)	1.998	531.962	3.50015	42.244	4463.58	1702.17	20.5671	258.422	3739.04	1466.06	38.9187	1.63459	23.2247
DWR28	CB-HIB-118_2014: ICARDA-Breeding program	CB-HIB-118	High Input/Irrigated/Malting	Variety	2	DWR28	4.14	413.467	3.11851	34.5373	4524.94	1615.17	17.6011	230.347	2966.94	1344.13	324.471	0.991714	14.4975
DWR28	CB-HIB-118_2014: ICARDA-Breeding program	CB-HIB-118	High Input/Irrigated/Malting	Variety	2	DWR28	4.14497	606.385	3.27566	29.9719	3899.62	1666.48	19.7492	452.718	3270.64	1368.13	356.482	1.79828	20.3463
RD2668	CB-HIB-119_2014: ICARDA-Breeding program	CB-HIB-119	High Input/Irrigated/Malting	Variety	2	RD2668	0.649593	380.662	4.71971	43.3008	4273.28	1544.76	19.9254	490.518	2988.25	1392.13	252.602	0.829506	14.5907
RD2668	CB-HIB-119_2014: ICARDA-Breeding program	CB-HIB-119	High Input/Irrigated/Malting	Variety	2	RD2668	1.48238	375.83	2.53159	32.9147	5546.35	1246.87	16.4359	561.172	2973.68	1320.02	533.947	1.15777	13.3
DWRUB52	CB-HIB-120_2014: ICARDA-Breeding program	CB-HIB-120	High Input/Irrigated/Malting	Variety	2	DWRUB52	2.07644	412.193	5.45066	46.0447	3599.74	1614.59	19.8642	292.171	2822.1	1484.65	408.194	1.11149	15.0679
DWRUB52	CB-HIB-120_2014: ICARDA-Breeding program	CB-HIB-120	High Input/Irrigated/Malting	Variety	2	DWRUB52	1.93136	453.093	5.46392	40.3502	3796.44	1267.4	20.1463	306.444	2910.09	1432.65	617.407	0.992137	16.5049
RD2668_1	CB-HIB-119_2014: ICARDA-Breeding program	CB-HIB-119	High Input/Irrigated/Malting	Variety	2	RD2668_1	1.81108	572.021	3.6947	43.0044	4636.83	1296.83	17.152	198.285	3599.96	1558.82	133.424	2.14911	17.437
RD2668_1	CB-HIB-119_2014: ICARDA-Breeding program	CB-HIB-119	High Input/Irrigated/Malting	Variety	2	RD2668_1	3.8095	471.966	3.00231	28.87	5298.87	1283.22	13.847	285.492	3615.74	1319.42	192.726	1.47495	19.8418
Furat-1	MP68-88_2014: ICARDA-Breeding program	MP68-88	Low Input	Variety	6	Furat-1	2.12471	427.884	3.95224	51.2761	4764.04	1444.66	16.7878	90.76	3955.97	1698.23	423.262	1.31507	22.3342
Furat-1	MP68-88_2014: ICARDA-Breeding program	MP68-88	Low Input	Variety	6	Furat-1	3.45176	319.04	1.75945	33.9326	4301.25	1126.24	12.6547	148.452	2863.96	1327.06	126.538	1.22672	15.5343
Rihane 03	1GSBYT-121_2014: ICARDA-Breeding program	1GSBYT-121	Low Input	Variety	6	Rihane 03	0.741418	390.454	2.63384	44.3143	4909.53	1233.57	13.639	179.661	3712.54	1231.81	157.748	0.794622	15.9898
Rihane 03	1GSBYT-121_2014: ICARDA-Breeding program	1GSBYT-121	Low Input	Variety	6	Rihane 03	3.2247	442.179	2.72079	34.2363	5492.08	1416.87	16.0507	204.91	4055.76	1223.8	186.355	1.36319	22.5811
LAKHAN (K226)	CB-HIB-108_2014: ICARDA-Breeding program	CB-HIB-108	Low Input/Feed	Variety	6	LAKHAN (K226)	3.01253	508.803	2.98492	30.105	4519.3	1403.9	15.9902	355.946	2921.61	1338.41	193.828	1.65669	17.3269
Alanda 01	CB-HIB-1_2014: ICARDA-Breeding program	CB-HIB-1	Low Input/High Input	Variety	6	Alanda 01	4.56392	398.963	4.86805	37.0717	5230.86	1538.63	12.5125	169.853	3577.65	1435.54	178.527	1.38372	21.9978
DWR28	CB-HIB-118_2014: ICARDA-Breeding program	CB-HIB-118	High Input/Irrigated/Malting	Variety	2	DWR28	4.14249	509.926	3.19708	32.2546	4212.28	1640.82	18.6751	341.533	3118.79	1356.13	340.476	1.395	17.4219
DWRUB52	CB-HIB-120_2014: ICARDA-Breeding program	CB-HIB-120	High Input/Irrigated/Malting	Variety	2	DWRUB52	2.0039	432.643	5.45729	43.1975	3698.09	1441	20.0052	299.307	2866.1	1458.65	512.8	1.05181	15.7864
Furat-1	MP68-88_2014: ICARDA-Breeding program	MP68-88	Low Input	Variety	6	Furat-1	2.78823	373.462	2.85584	42.6044	4532.64	1285.45	14.7212	119.606	3409.97	1512.65	274.9	1.27089	18.9343
GEETANJALI (K1149)	CB-HIB-110_2014: ICARDA-Breeding program	CB-HIB-110	Low Input/Feed	Variety	6	GEETANJALI (K1149)	1.83561	490.872	3.38629	45.4979	4235.57	1406.16	18.5869	212.289	3323.85	1373.79	37.8461	1.36296	18.437
Harmal	CB-HIB-4_2014: ICARDA-Breeding program	CB-HIB-4	Low Input	Variety	2	Harmal	1.49054	412.087	3.93813	33.9111	4617.31	1197.3	11.2073	185.671	2876.03	1289.57	253.497	1.09156	16.062
JYOTI	CB-HIB-107_2014: ICARDA-Breeding program	CB-HIB-107	High Input/Irrigated/Feed	Variety	6	JYOTI	0.592144	533.016	2.62509	38.3759	4273.01	1239.69	15.1328	205.288	2921.86	1281.96	285.104	1.0667	12.3635
Nawair-01	CB-HIB-5_2014: ICARDA-Breeding program	CB-HIB-5	Low Input	Variety	2	Nawair-01	2.78137	404.679	3.20611	36.9972	5028.77	1487.11	14.1058	138.363	3542.95	1297.24	301.268	1.50608	14.9504
PETUNIA 1	CB-HIB-31_2014: ICARDA-Breeding program	CB-HIB-31	High Input/low input	Variety	6	PETUNIA 1	1.06258	366.389	2.81291	33.9484	4534.61	1654.3	16.2969	127.494	3482.59	1430.27	55.917	0.76893	20.2857
RD2668	CB-HIB-119_2014: ICARDA-Breeding program	CB-HIB-119	High Input/Irrigated/Malting	Variety	2	RD2668	1.06599	378.246	3.62565	38.1078	4909.82	1395.81	18.1807	525.845	2980.97	1356.07	393.275	0.993638	13.9454
RD2668_1	CB-HIB-119_2014: ICARDA-Breeding program	CB-HIB-119	High Input/Irrigated/Malting	Variety	2	RD2668_1	2.81029	521.993	3.3485	35.9372	4967.85	1290.02	15.4995	241.889	3607.85	1439.12	163.075	1.81203	18.6394
Rihane 03	1GSBYT-121_2014: ICARDA-Breeding program	1GSBYT-121	Low Input	Variety	6	Rihane 03	1.98306	416.316	2.67731	39.2753	5200.81	1325.22	14.8449	192.286	3884.15	1227.8	172.051	1.0789	19.2855
Rihane 03	1GSBYT-121_2014: ICARDA-Breeding program	1GSBYT-121	Low Input	Variety	6	Rihane 03	0.781206	439.889	3.23589	34.0457	5010.73	1275.76	11.7805	159.028	3642.48	1161.11	135.179	1.00746	18.9329
Tichedrette	MP11-11_2014: ICARDA-Breeding program	MP11-11	Low Input	Variety	2	Tichedrette	4.49646	414.924	3.75162	33.627	4847.79	1655.63	14.3098	141.575	4011.33	1354.81	397.78	1.34494	25.2026
WI2291	CB-HIB-3_2014: ICARDA-Breeding program	CB-HIB-3	Low Input	Variety	2	WI2291	2.53312	390.445	5.55681	42.3279	4612.77	1490.56	14.1752	226.705	3418.36	1505.64	464.19	1.11811	19.7104

## Sheet: Supplemental Table S2
Supplemental Table S2. Multi nutreints concentration in barley grains assessed using Inductively Coupled Plasma-Optical Emission Spectrometry (ICP-OES) in Wet Land Research Group Laboratory, North Dakota State University, Fargo, ND in 2015.
Genotypes		Ba	Ca	Cu	K	Mg	Mn	Na	P	S	Si	Sr	Zn	Fe
Alanda 01
	Mean±SD	4.6±1.4	399±23	4.9±1.4	5230.9±376.4	1538.6±32.8	12.5±0.9	169.9±52.5	3577.7±284.6	1435.5±87.8	178.5±0.1	1.4±0.1	22±3.4	37.1±9.7
	Range	6-3.2	422-375.9	6.2-3.5	5607.3-4854.4	1571.4-1505.8	13.4-11.6	222.3-117.4	3862.3-3293	1523.4-1347.7	178.6-178.4	1.5-1.3	25.4-18.6	46.7-27.4
DWR28
	Mean±SD	4.1±0	509.9±96.5	3.2±0.1	4212.3±312.7	1640.8±25.7	18.7±1.1	341.5±111.2	3118.8±151.9	1356.1±12	340.5±16	1.4±0.4	17.4±2.9	32.3±2.3
	Range	4.1-4.1	606.4-413.5	3.3-3.1	4524.9-3899.6	1666.5-1615.2	19.8-17.6	452.7-230.4	3270.6-2966.9	1368.1-1344.1	356.5-324.5	1.8-1	20.4-14.5	34.5-30
DWRUB52
	Mean±SD	2±0.1	432.6±20.5	5.5±0	3698.1±98.4	1441±173.6	20±0.1	299.3±7.1	2866.1±44	1458.7±26	512.8±104.6	1.1±0.1	15.8±0.7	43.2±2.9
	Range	2.1-1.9	453.1-412.2	5.5-5.5	3796.4-3599.7	1614.6-1267.4	20.2-19.9	306.4-292.2	2910.1-2822.1	1484.7-1432.7	617.4-408.2	1.1-1	16.5-15.1	46-40.4
Furat-1
	Mean±SD	2.8±0.7	373.5±54.4	2.9±1.1	4532.6±231.4	1285.5±159.2	14.7±2.1	119.6±28.9	3410±546	1512.7±185.6	274.9±148.4	1.3±0	18.9±3.4	42.6±8.7
	Mean±SD	3.5-2.1	427.9-319	4-1.8	4764-4301.3	1444.7-1126.2	16.8-12.7	148.5-90.8	3956-2864	1698.2-1327.1	423.3-126.5	1.3-1.2	22.3-15.5	51.3-33.9
Geetanjali (K1149)
	Range	1.8±0.2	490.9±41.1	3.4±0.1	4235.6±228	1406.2±296	18.6±2	212.3±46.1	3323.9±415.2	1373.8±92.3	37.9±1.1	1.4±0.3	18.4±4.8	45.5±3.3
	Mean±SD	2-1.7	532-449.8	3.5-3.3	4463.6-4007.6	1702.2-1110.2	20.6-16.6	258.4-166.2	3739-2908.7	1466.1-1281.5	38.9-36.8	1.6-1.1	23.2-13.7	48.8-42.2
Harmal
	Range	1.5±0.7	412.1±129.9	3.9±0.1	4617.3±283.5	1197.3±72.7	11.2±0.8	185.7±32.7	2876±312.6	1289.6±97.5	253.5±84.4	1.1±0.4	16.1±0.2	33.9±5.5
	Mean±SD	2.2-0.8	542-282.2	4-3.8	4900.8-4333.8	1270-1124.6	12-10.4	218.4-153	3188.7-2563.4	1387.1-1192.1	337.9-169.2	1.5-0.7	16.3-15.9	39.4-28.5
JYOTI
	Mean±SD	0.6±0.1	533±177.3	2.6±0.1	4273±501.9	1239.7±10.2	15.1±0.1	205.3±4.3	2921.9±425	1282±106.6	285.1±106.6	1.1±0.5	12.4±0.8	38.4±5.4
	Range	0.7-0.5	710.4-355.7	2.7-2.6	4774.9-3771.1	1249.8-1229.5	15.2-15.1	209.6-201	3346.9-2496.8	1388.6-1175.3	391.7-178.5	1.5-0.6	13.2-11.6	43.8-33
Lakhan (K226)
	Mean±SD	3±0.8	508.8±76.9	3±0.1	4519.3±270.9	1403.9±173.5	16±1.2	356±18.7	2921.6±215.8	1338.4±153.9	193.8±9.5	1.7±0.6	17.3±2.4	30.1±5.3
	Range	3.8-2.2	585.7-431.9	3.1-2.9	4790.2-4248.4	1577.4-1230.5	17.2-14.8	374.6-337.3	3137.4-2705.8	1492.4-1184.5	203.4-184.3	2.2-1.1	19.8-14.9	35.4-24.8
Nawair-01
	Mean±SD	2.8±0.3	404.7±94.7	3.2±0.4	5028.8±448.2	1487.1±60.7	14.1±0.5	138.4±23.3	3543±382.3	1297.2±46.1	301.3±99.5	1.5±0.6	15±2.1	37±1.9
	Mean±SD	3.1-2.5	499.4-310	3.6-2.8	5476.9-4580.6	1547.8-1426.4	14.6-13.6	161.7-115.1	3925.2-3160.7	1343.4-1251.1	400.7-201.8	2.1-0.9	17.1-12.9	38.9-35.1
Petunia 1
	Range	1.1±0.3	366.4±33.7	2.8±0.4	4534.6±178.6	1654.3±95.6	16.3±1.5	127.5±30.4	3482.6±153.5	1430.3±43.4	55.9±28	0.8±0.2	20.3±0.6	34±0.1
	Mean±SD	1.3-0.8	400.1-332.7	3.2-2.4	4713.2-4356	1749.9-1558.7	17.8-14.8	157.9-97.1	3636.1-3329.1	1473.7-1386.9	83.9-27.9	1-0.6	20.9-19.7	34.1-33.8
RD2668
	Range	1.1±0.4	378.3±2.4	3.6±1.1	4909.8±636.5	1395.8±148.9	18.2±1.7	525.8±35.3	2981±7.3	1356.1±36.1	393.3±140.7	1±0.2	14±0.7	38.1±5.2
	Mean±SD	1.5-0.7	380.7-375.8	4.7-2.5	5546.4-4273.3	1544.8-1246.9	19.9-16.4	561.2-490.5	2988.3-2973.7	1392.1-1320	534-252.6	1.2-0.8	14.6-13.3	43.3-32.9
RD2668_1
	Mean±SD	2.8±1	522±50	3.4±0.4	4967.9±331	1290±6.8	15.5±1.7	241.9±43.6	3607.9±7.9	1439.1±119.7	163.1±29.7	1.8±0.3	18.6±1.2	35.9±7.1
	Range	3.8-1.8	572-472	3.7-3	5298.9-4636.8	1296.8-1283.2	17.2-13.9	285.5-198.3	3615.7-3600	1558.8-1319.4	192.7-133.4	2.2-1.5	19.8-17.4	43-28.9
Rihane 03
	Mean±SD	1.4±1	355.1±177.9	2.9±0.8	4271.4±2108.5	1088.8±535.1	12.5±3.3	150.4±73.1	3157.7±1554.3	1002.6±488.6	132.9±63.1	2.8±4.4	18.1±4	31.6±15.6
		3.2-0.7	496.7-1.8	4.4-2.1	5492.1-4.8	1416.9-5.8	16.1-6.8	204.9-7.8	4055.8-8.8	1231.8-9.8	186.4-10.8	11.8-0.8	22.6-12.8	44.3-3.8
Tichedrette
	Range	4.5±0.2	414.9±11.4	3.8±0.5	4847.8±350.8	1655.6±148.6	14.3±0.6	141.6±28.5	4011.3±412	1354.8±48.4	397.8±183.6	1.3±0.4	25.2±3.5	33.6±1.6
	Mean±SD	4.7-4.3	426.4-403.5	4.2-3.3	5198.5-4497	1804.2-1507	14.9-13.7	170.1-113.1	4423.3-3599.4	1403.2-1306.4	581.4-214.2	1.7-1	28.7-21.7	35.2-32
WI2291
	Mean±SD	2.5±1.1	390.5±31.4	5.6±0.4	4612.8±2	1490.6±32	14.2±0.1	226.7±20	3418.4±405.6	1505.6±161.8	464.2±232.7	1.1±0.2	19.7±4.7	42.3±1.4
	Range	3.7-1.4	421.9-359	5.9-5.2	4614.8-4610.8	1522.6-1458.6	14.3-14	246.7-206.8	3824-3012.8	1667.5-1343.8	696.9-231.5	1.3-1	24.4-15	43.8-40.9
